# Supplementary material for: Trapping atmospheric CO2 with gold
Source: Royal Society of Chemistry journal article supplement (doi:10.1039/c4cc05910g), 2014-01-01
Supplement: c4cc05910g1.pdf [file c4cc05910g1.pdf]

## SUPPORTING INFORMATION

### Trapping Atmospheric CO<sub>2</sub> with Gold

Alba Collado,<sup>†</sup> Adrián Gómez-Suárez,<sup>†</sup> Paul B. Webb,<sup>‡</sup> Hedi Kruger,<sup>†</sup> Michael Bühl,<sup>†</sup>  
David B. Cordes,<sup>†</sup> Alexandra M. Z. Slawin,<sup>†</sup> and Steven P. Nolan<sup>†\*</sup>

<sup>†</sup> EaStCHEM School of Chemistry, University of St Andrews, St Andrews, KY16  
9ST, U.K.

<sup>‡</sup> Sasol Technology UK Ltd, Purdie Building, North Haugh, St Andrews, KY16 9ST,  
U.K.

[snolan@st-andrews.ac.uk](mailto:snolan@st-andrews.ac.uk)

- Table of contents
  - General information .....S2
  - Reaction of [Au(OH)(IPr)] (1) and [{Au(IPr)}<sub>2</sub>(μ-OH)][BF<sub>4</sub>] (2) with CO<sub>2</sub>.....S2
  - Reaction of [Au(OH)(IPr)] (1) and [{Au(IPr)}<sub>2</sub>(μ-OH)][BF<sub>4</sub>] (2) with <sup>13</sup>CO<sub>2</sub>.....S5
  - Reaction of [Au(OH)(IPr)] (1) with CO<sub>2</sub>.....S6
  - Reaction of [Au(OH)(IPr)] (1) and [{Au(IPr)}<sub>2</sub>(μ-OH)][BF<sub>4</sub>] (2) with air.....S7
  - Reaction of [Au(OH)(IPr)] and [Au(NTf<sub>2</sub>)(IPr)] with CO<sub>2</sub>.....S8
  - Reaction of [Au(OH)(SIPr)] and [{Au(IPr)}<sub>2</sub>(μ-OH)][BF<sub>4</sub>] with <sup>13</sup>CO<sub>2</sub>.....S9
  - Reaction of [Au(OH)(IPr)], [Au(OH)(SIPr)], [Au(NTf<sub>2</sub>)(IPr<sup>Cl</sup>)] with <sup>13</sup>CO<sub>2</sub>...S10
  - Reaction of [{Au(IPr)}<sub>3</sub>(μ<sup>3</sup>-CO<sub>3</sub>)][BF<sub>4</sub>] with phenylacetylene.....S11
  - Catalytic experiments.....S12
  - DFT calculations.....S14
  - Kinetic Experiments.....S25
  - Crystallographic information.....S27

## General information

- All reactions were carried under air and technical grade solvent were used, unless otherwise stated.
- Dry solvents were used in the isolation of **3** and the kinetics experiments. Solvents were dried following standard procedures.
- $^1\text{H}$ , and  $^{13}\text{C}\{^1\text{H}\}$  Nuclear Magnetic Resonance (NMR) spectra were recorded on a Bruker-400 MHz or 300 MHz spectrometer at ambient temperature in  $\text{CDCl}_3$ . Chemical shifts (expressed in parts per million) are referenced to residual solvent peaks.
- Elemental analyses were performed at London Metropolitan University 166-220 Holloway Road, London, N7 8DB.
- **1**,<sup>1</sup> **2**,<sup>2</sup> **6**,<sup>3</sup>  $[\text{Au}(\text{OH})(\text{SIPr})]$ ,<sup>1</sup> and  $[\text{Au}(\text{NTf}_2)(\text{IPr}^{\text{Cl}})]$ <sup>1</sup> were prepared according to reported procedures.
- Infrared spectra ( $\nu$ ) were recorded on a Shimadzu Fourier transform IR Affinity-1 Infrared spectrophotometer using a MIRacle™ single reflection horizontal ATR (diamond).
- Crystals of **3** were grown by slow diffusion of pentane into a saturated dichloromethane solution. CCDC 1006986 (**3**) contains the supplementary crystallographic data for this paper. These data can be obtained free of charge from The Cambridge Crystallographic Data Centre via [http://www.ccdc.cam.ac.uk/data\\_request/cif](http://www.ccdc.cam.ac.uk/data_request/cif).

**Reaction of  $[\text{Au}(\text{OH})(\text{IPr})]$  (**1**) and  $[\{\text{Au}(\text{IPr})\}_2(\mu\text{-OH})][\text{BF}_4]$  (**2**) with  $\text{CO}_2$ : Formation of  $[\{\text{Au}(\text{IPr})\}_3(\mu\text{-CO}_3)][\text{BF}_4]$  (**3**):** In a vial, under air,  $[\text{Au}(\text{OH})(\text{IPr})]$  (**1**) (5.0 mg, 8.3  $\mu\text{mol}$ ) and  $[\{\text{Au}(\text{IPr})\}_2(\mu\text{-OH})][\text{BF}_4]$  (**2**) (10.6 mg, 8.3  $\mu\text{mol}$ ) were dissolved in 0.7 mL of  $\text{CDCl}_3$ .  $\text{CO}_2$  was bubbled through the solution for 5 min and the solution was analysed by  $^1\text{H}$  NMR spectroscopy. Full conversion to **3** was obtained. **Isolation of  $[\{\text{Au}(\text{IPr})\}_3(\mu^3\text{-CO}_3)][\text{BF}_4]$  (**3**)** In a Schlenk flask containing activated 4 Å molecular sieves, under argon,  $[\text{Au}(\text{OH})(\text{IPr})]$  (**1**) (50.0 mg, 0.083

<sup>1</sup> S. R. Patrick, A. Gómez-Suárez, A. M. Z. Slawin, S. P. Nolan, *Organometallics* **2013**, *33*, 421-424.

<sup>2</sup> R. S. Ramón, S. Gaillard, A. Poater, L. Cavallo, A. M. Z. Slawin, S. P. Nolan, *Chem. Eur. J.* **2011**, *17*, 1238-1246

<sup>3</sup> S. Gaillard, A. M. Z. Slawin, S. P. Nolan, *Chem. Commun.* **2010**, *46*, 2742-2744.

mmol) and  $[\{\text{Au}(\text{IPr})\}_2(\mu\text{-OH})][\text{BF}_4]$  (**2**) (106.0 mg, 0.083 mmol) were dissolved in 4.0 mL of dry dichloromethane. The argon atmosphere was then replaced with  $\text{CO}_2$  by three vacuum- $\text{CO}_2$  cycles. The solution was then stirred for 15 min. After this time, the solution was transferred *via* cannula to another Schlenk flask and concentrated under vacuum. The subsequent addition of hexane (3.0 mL) afforded a white solid that was washed with further portions of hexane (2 x 1.0 mL) and dried under vacuum. Yield 120 mg (76 %).

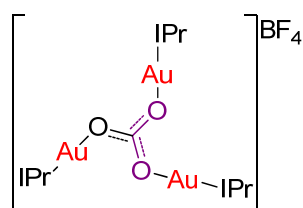

**Anal.** Calcd. for  $\text{C}_{82}\text{H}_{109}\text{Au}_3\text{BF}_4\text{N}_6\text{O}_3$ : C 51.71; H 5.77; N 4.41. Found: C 51.84; H 5.67; N 4.53.  $^1\text{H}$  NMR (500 MHz,  $\text{CDCl}_3$ )  $\delta$  7.40 (t,  $J = 7.8$  Hz, 6 H,  $\text{CH}_{p\text{-Ar}}$ ), 7.16 (d,  $J = 7.8$  Hz, 12 H,  $\text{CH}_{m\text{-Ar}}$ ), 7.14 (s, 6 H,  $\text{CH}^{4,5}$ ), 2.36 (sept,  $J = 6.8$  Hz, 12 H,  $\text{CH}(\text{CH}_3)_2$ ), 1.15 (d,  $J = 6.8$  Hz, 36 H,  $\text{CH}(\text{CH}_3)_2$ ), 1.08 (d,  $J = 6.8$  Hz, 36 H,  $\text{CH}(\text{CH}_3)_2$ ).  $^{13}\text{C}\{^1\text{H}\}$ -DEPTQ NMR (126 MHz,  $\text{CDCl}_3$ )  $\delta$  169.2 ( $\text{CO}_3$ ), 166.4 ( $\text{C}_{\text{carb}}$ ), 145.6 ( $\text{C}_{o\text{-Ar}}$ ), 134.0 ( $\text{C}_{N\text{-Ar}}$ ), 130.7 ( $\text{CH}_{p\text{-Ar}}$ ), 124.1 ( $\text{CH}_{m\text{-Ar}}$ ), 123.5 ( $\text{CH}_{\text{imid}}$ ), 28.8 ( $\text{CH}^i\text{Pr}$ ), 24.5 ( $\text{CH}_3$ ), 24.1 ( $\text{CH}_3$ ).  $^{19}\text{F}\{^1\text{H}\}$  NMR (282 MHz,  $\text{CDCl}_3$ )  $\delta$  -155.05, -155.10. ATR-IR ( $\text{cm}^{-1}$ ):  $\nu$  1433.1 ( $\text{CO}_3$ ) (s).

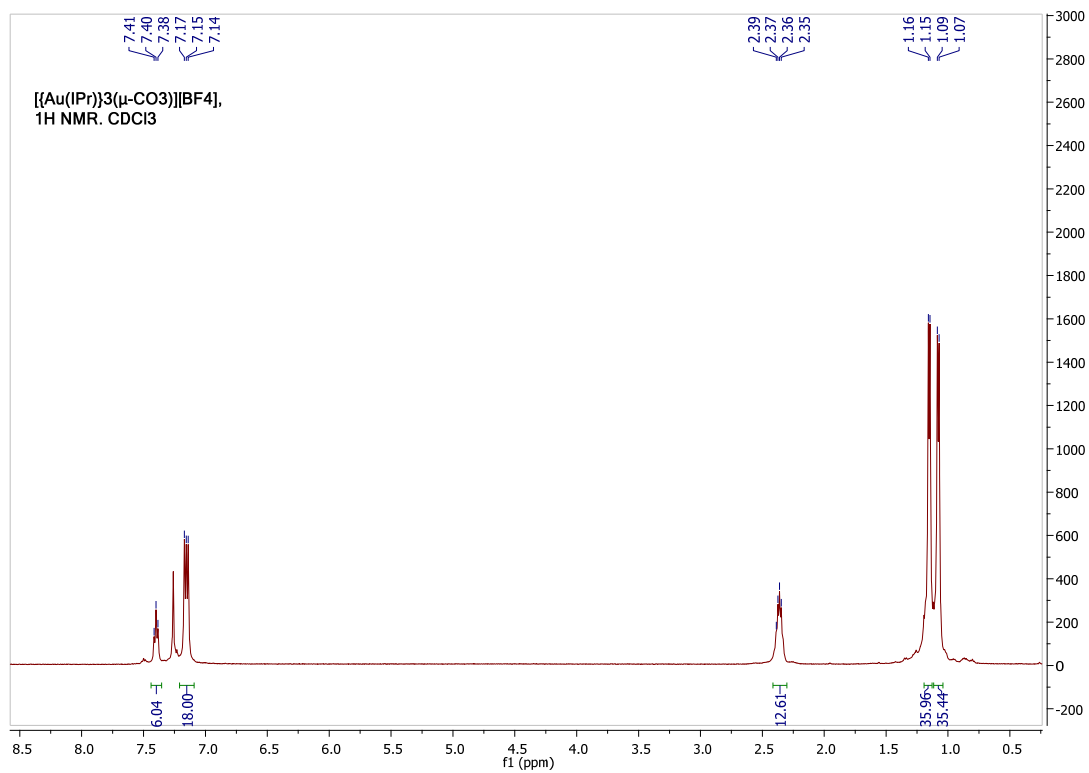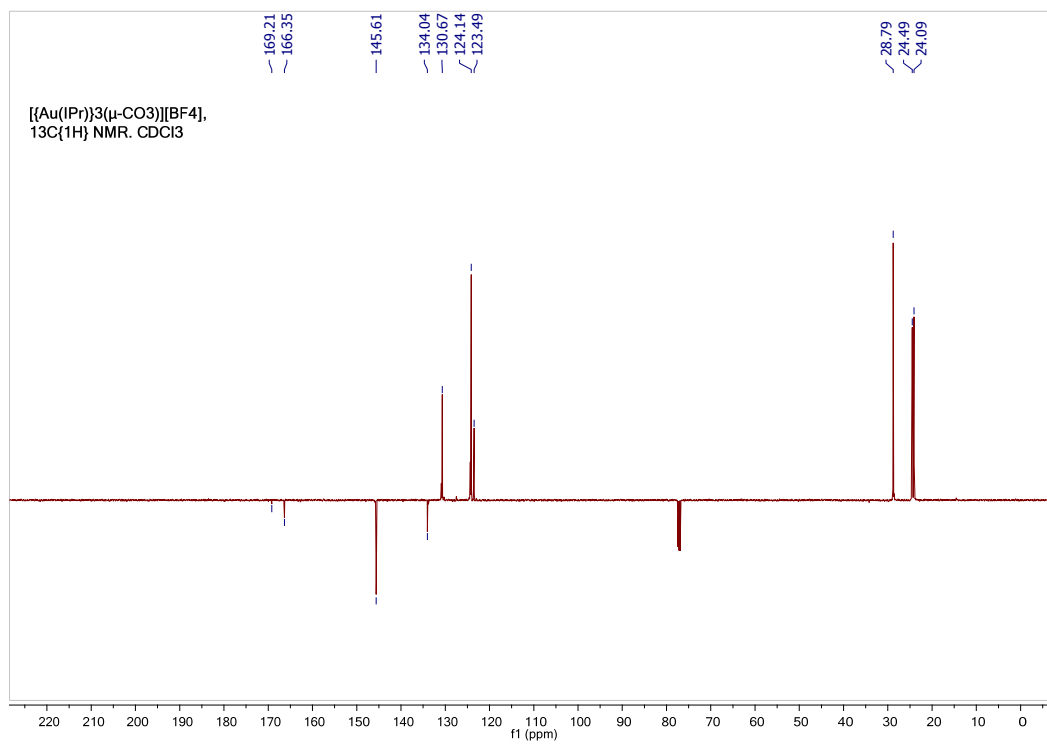

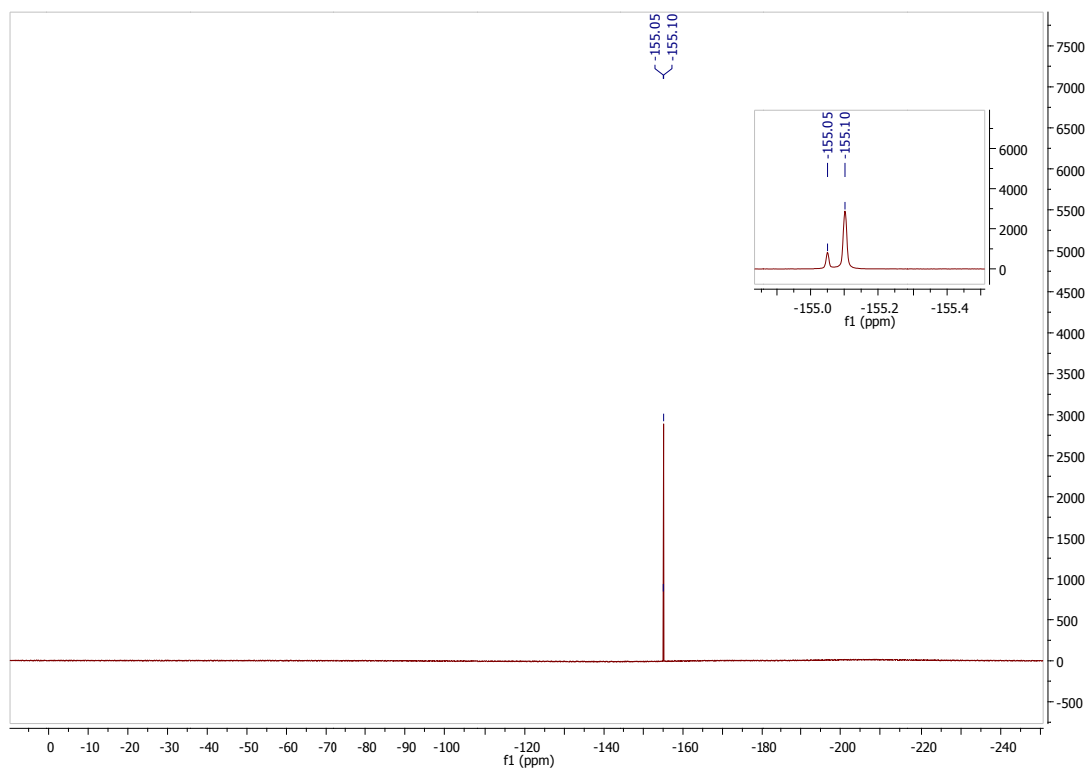

ATR-IR spectrum of  $[\{\text{Au}(\text{IPr})\}_3(\mu\text{-CO}_3)][\text{BF}_4](3)$

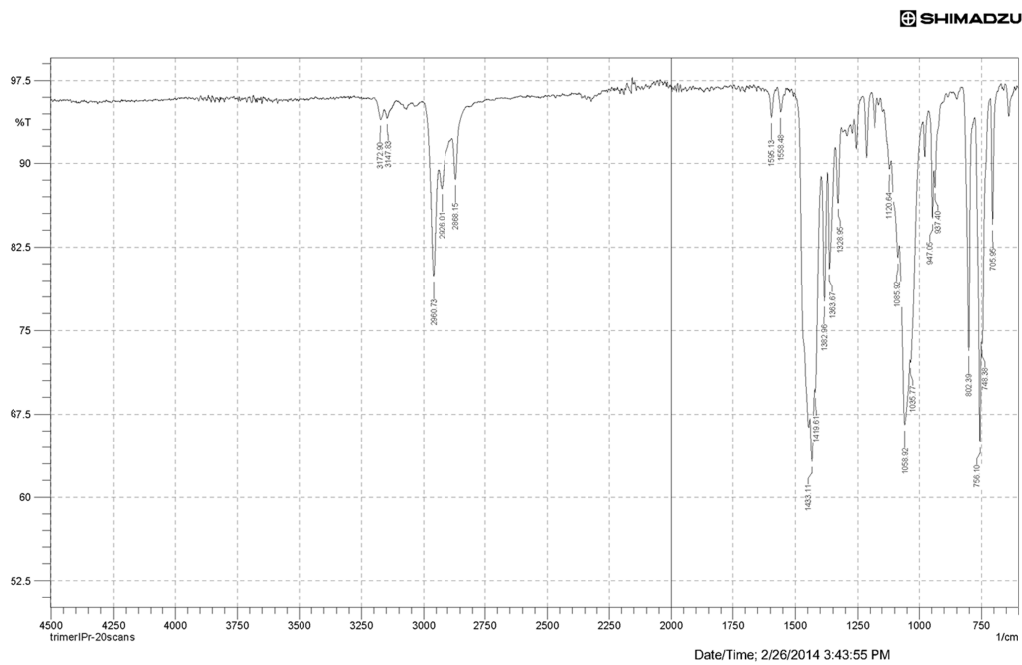

### Reaction of [Au(OH)(IPr)] (1) with CO<sub>2</sub>

10 mg of [Au(OH)IPr] were placed in a J-Young NMR tube, and dissolved in 0.5 mL of CDCl<sub>3</sub>. The solution was exposed to CO<sub>2</sub> atmosphere by freezing-thaw cycles. A mixture of complexes was obtained. One of the species in the mixture was identified as starting material.

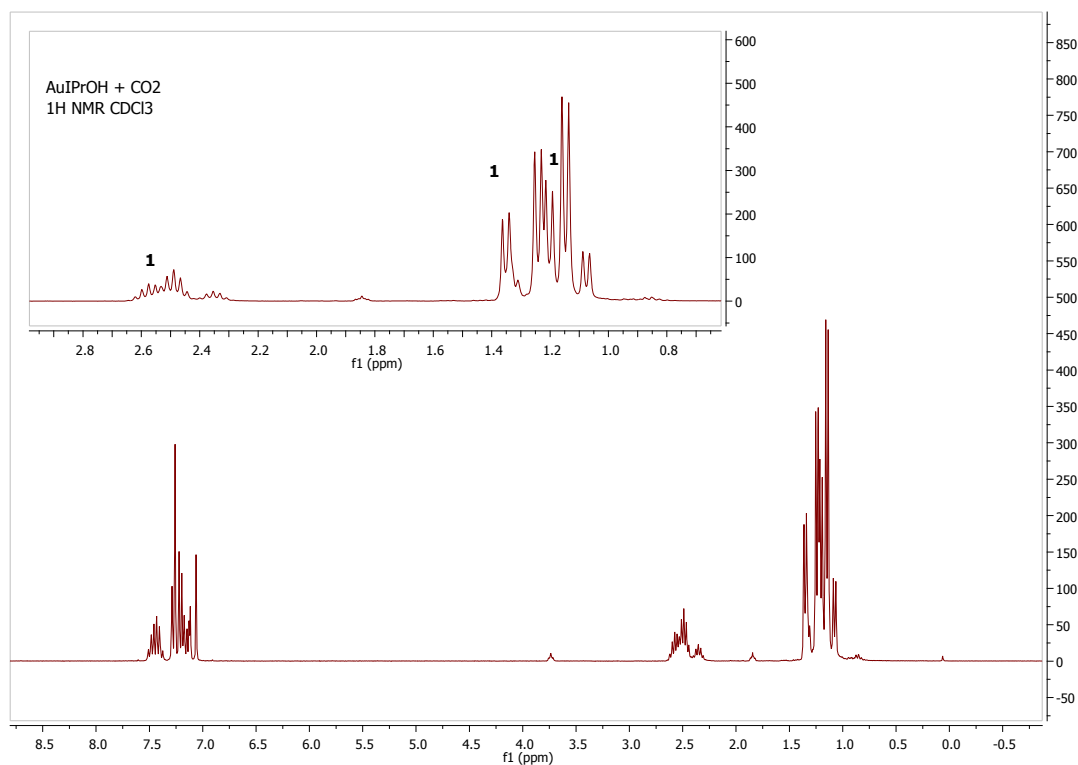

### Reaction of [Au(OH)(IPr)] (1) and [{Au(IPr)}<sub>2</sub>(μ-OH)][BF<sub>4</sub>] (2) with <sup>13</sup>CO<sub>2</sub>

The incorporation of CO<sub>2</sub> in the molecule was confirmed by placing **1** and **2** in CDCl<sub>3</sub> a J-Young NMR tube and exposing the solution to <sup>13</sup>CO<sub>2</sub>. The intensity of the signal at 169.2 ppm in the <sup>13</sup>C{<sup>1</sup>H}-DEPTQ NMR spectrum, assigned to the μ<sup>3</sup>-CO<sub>3</sub> increased significantly, confirming the origin of the carbonate moiety.

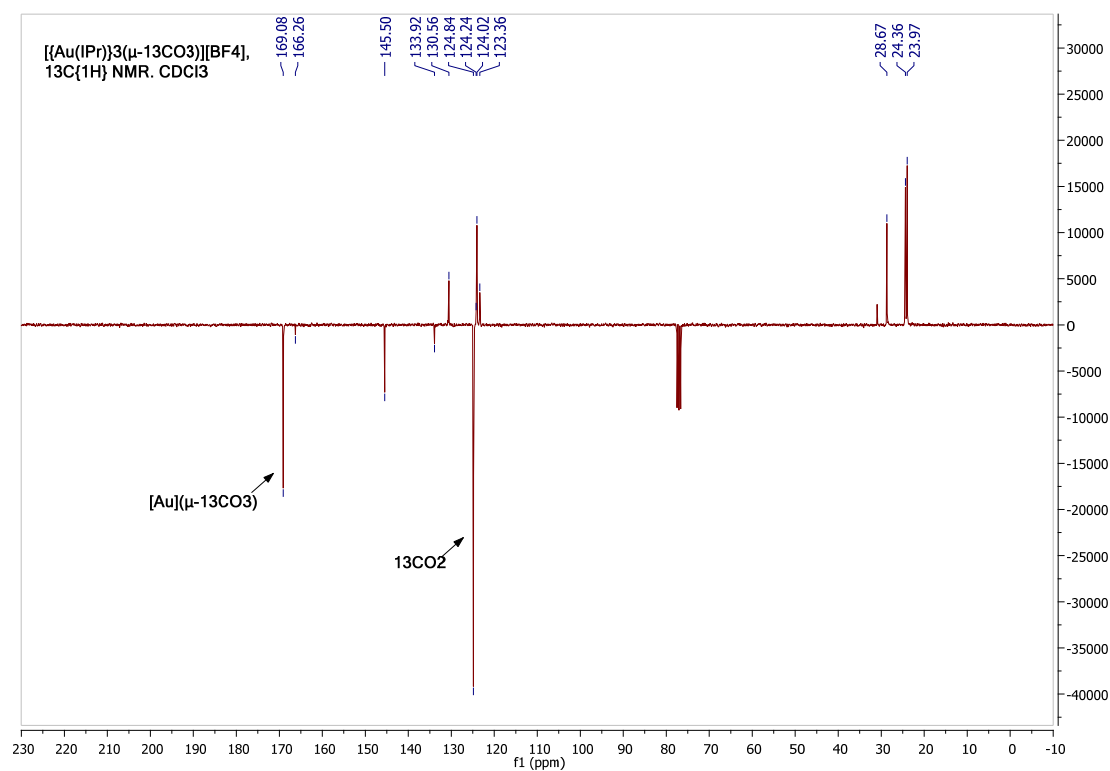

### Reaction of [Au(OH)(IPr)] (**1**) and [{Au(IPr)}<sub>2</sub>(μ-OH)][BF<sub>4</sub>] (**2**) with air:

In a vial, under air [Au(OH)(IPr)] (**1**) (10.0 mg, 16.6 μmol) and [{Au(IPr)}<sub>2</sub>(μ-OH)][BF<sub>4</sub>] (**2**) (21.2 mg, 16.6 μmol) were dissolved in 5.0 mL of CDCl<sub>3</sub>. Air was bubbled through the solution for 20 min and the solution was analyzed by <sup>1</sup>H NMR spectroscopy. The formation of **3** was observed in ca. 75 % conversion. The same reaction conducted in toluene, in a vial open to the air, also afforded **3**. In this case the reaction is slower and 7 h were required to obtain **3** in 75 % conversion.

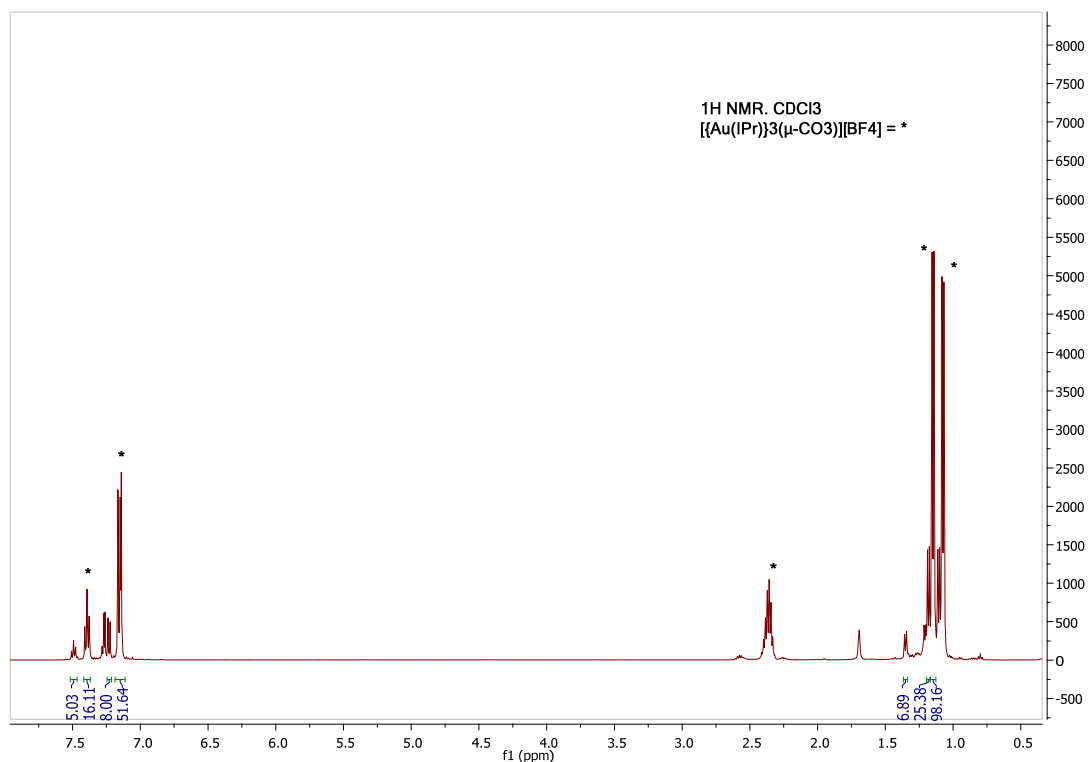

### Reaction of [Au(OH)(IPr)] and [Au(NTf<sub>2</sub>)(IPr)] with CO<sub>2</sub>:

CDCl<sub>3</sub> (0.7 mL) was added to a vial containing [Au(OH)(IPr)] (10 mg, 16.6 μmol, 2 equiv.) and [Au(NTf<sub>2</sub>)(IPr)] (7.2 mg, 8.3 μmol, 1 equiv.). CO<sub>2</sub> was bubbled through the solution for 5 min and the solution was analyzed by <sup>1</sup>H NMR spectroscopy. Full conversion to **3** was obtained.

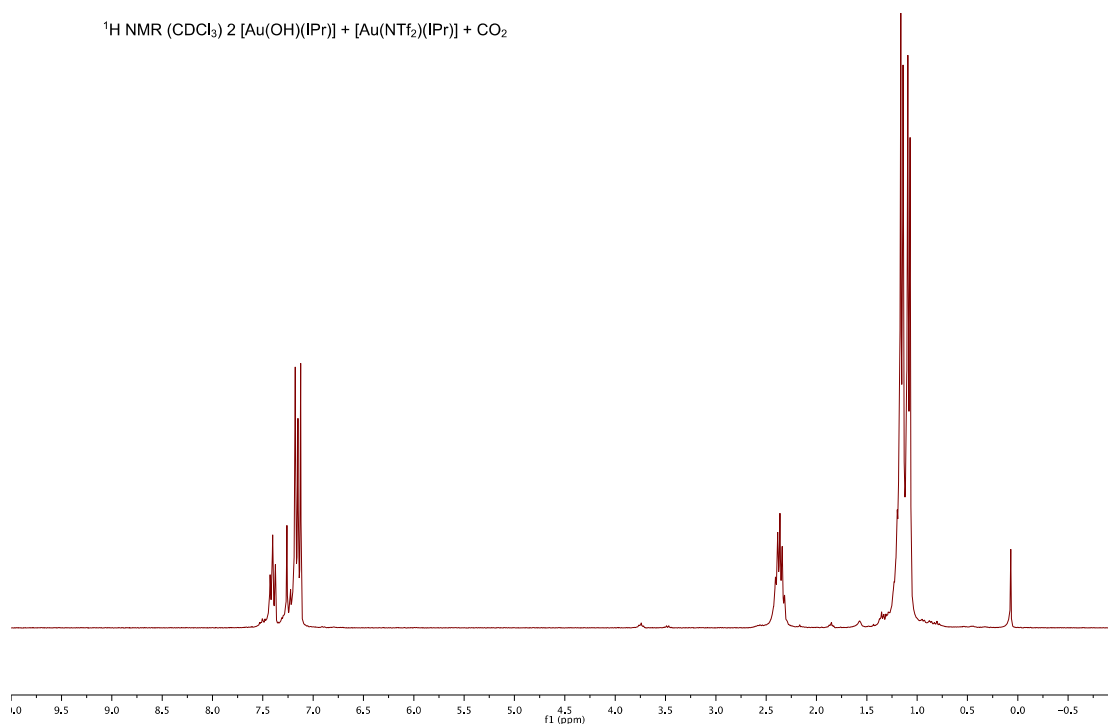



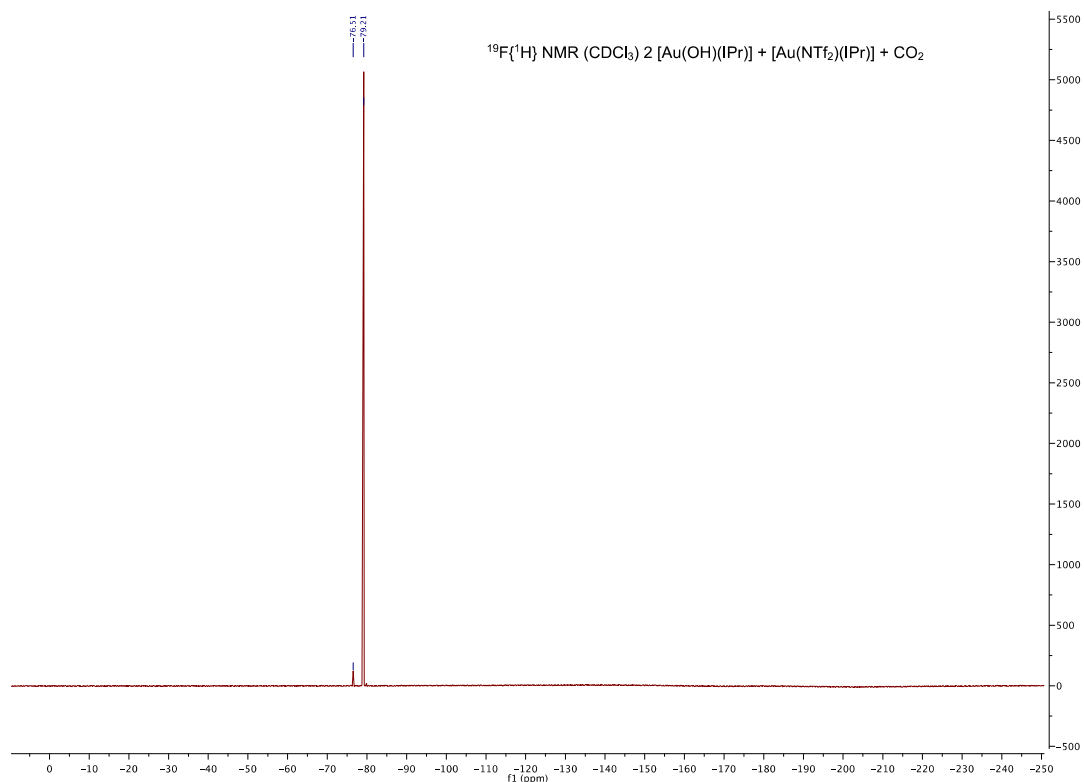

**Reaction of  $[\text{Au}(\text{OH})(\text{SIPr})]$  and  $[\{\text{Au}(\text{IPr})\}_2(\mu\text{-OH})][\text{BF}_4]$  with  $^{13}\text{CO}_2$ :**

$[\text{Au}(\text{OH})(\text{SIPr})]$  (5.0 mg, 8.29  $\mu\text{mol}$ ) and  $[\{\text{Au}(\text{IPr})\}_2(\mu\text{-OH})][\text{BF}_4]$  (10.6 mg, 8.3  $\mu\text{mol}$ ) were dissolved in  $\text{CDCl}_3$  (0.6 mL) at  $-30\text{ }^\circ\text{C}$  and placed in a J-Young NMR tube. The mixture was frozen, placed under vacuum, and exposed to  $^{13}\text{CO}_2$ .  $^{13}\text{C}\{^1\text{H}\}$ -DEPTQ NMR analyses indicated the formation of a series of  $[\{\text{Au}(\text{NHC})\}_3(\mu\text{-CO}_3)][\text{BF}_4]$  complexes.

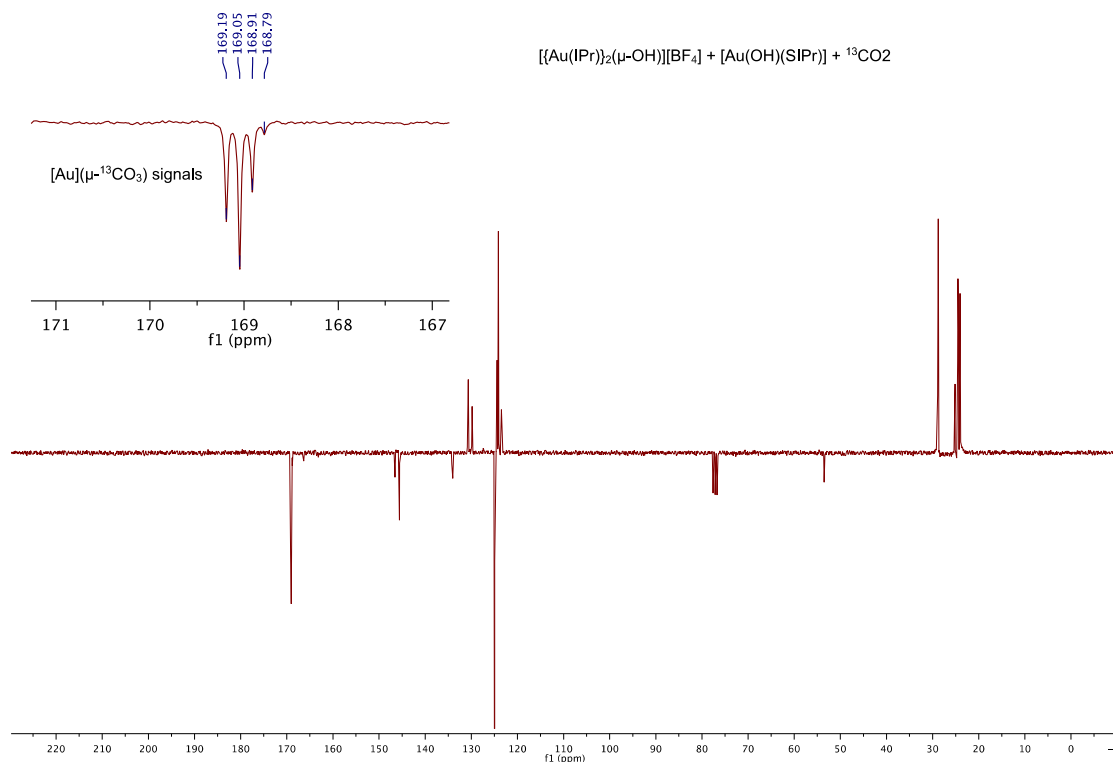

**Reaction of  $[\text{Au}(\text{OH})(\text{IPr})]$ ,  $[\text{Au}(\text{OH})(\text{SIPr})]$  and  $[\text{Au}(\text{NTf}_2)(\text{IPr}^{\text{Cl}})]$  with  ${}^{13}\text{CO}_2$ :**

$[\text{Au}(\text{OH})(\text{IPr})]$  (5.0 mg, 8.3  $\mu\text{mol}$ ),  $[\text{Au}(\text{OH})(\text{SIPr})]$  (5.0 mg, 8.3  $\mu\text{mol}$ ) and  $[\text{Au}(\text{NTf}_2)(\text{IPr}^{\text{Cl}})]$  (7.8 mg, 8.3  $\mu\text{mol}$ ) were dissolved in  $\text{CDCl}_3$  at  $-30\text{ }^\circ\text{C}$  and placed in a J-Young NMR tube. The mixture was frozen, placed under vacuum, and exposed to  ${}^{13}\text{CO}_2$ .  ${}^{13}\text{C}\{^1\text{H}\}$ -DEPTQ NMR analyses indicated the formation of a series of  $[\{\text{Au}(\text{NHC})\}_3(\mu\text{-CO}_3)][\text{BF}_4]$  complexes.

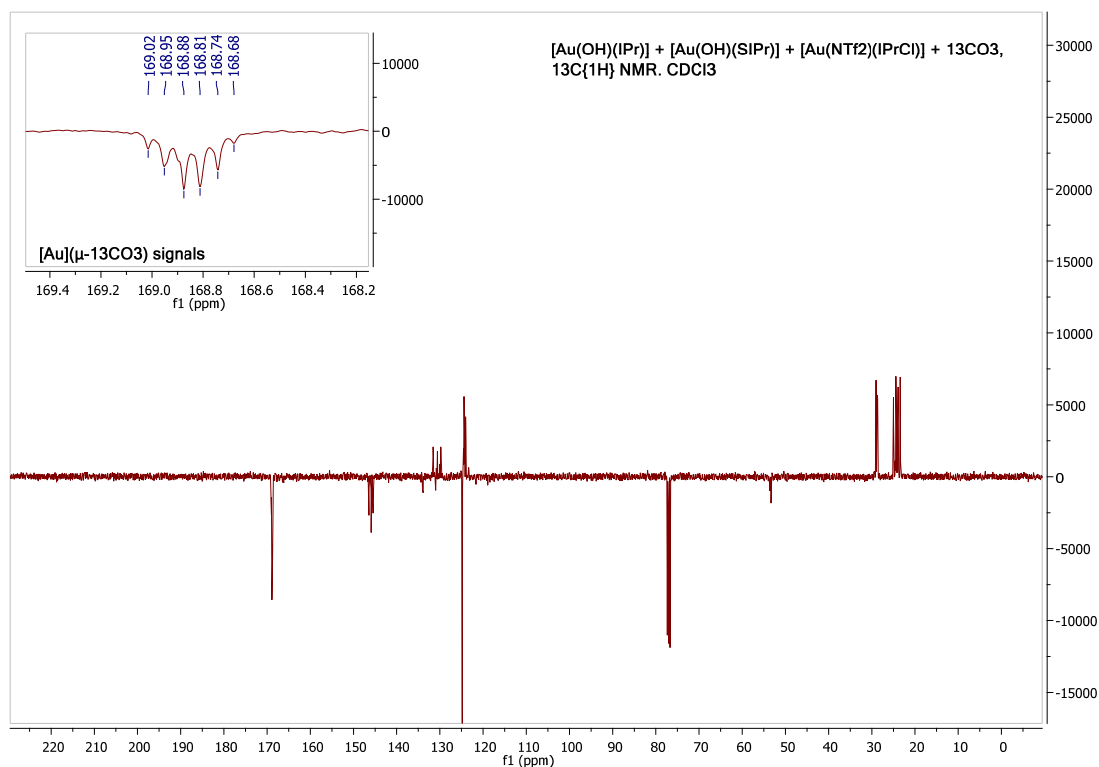

### Reaction of $[\{\text{Au}(\text{IPr})\}_3(\mu^3\text{-CO}_3)][\text{BF}_4]$ with phenylacetylene.

To a NMR tube, under Ar, containing  $[\{\text{Au}(\text{IPr})\}_3(\mu^3\text{-CO}_3)][\text{BF}_4]$  (10 mg, 5.2  $\mu\text{mol}$ ) a 0.5 mL solution of phenylacetylene (1.1 mg, 10.4  $\mu\text{mol}$ , 2 equiv.) in  $\text{CDCl}_3$  was added. The mixture was stirred for 16 h at room temperature. After this time a  $^1\text{H}$  NMR was acquired revealing complete conversion to monoaurated acetylide **7** and diaurated  $\sigma,\pi$ -acetylide **8**.

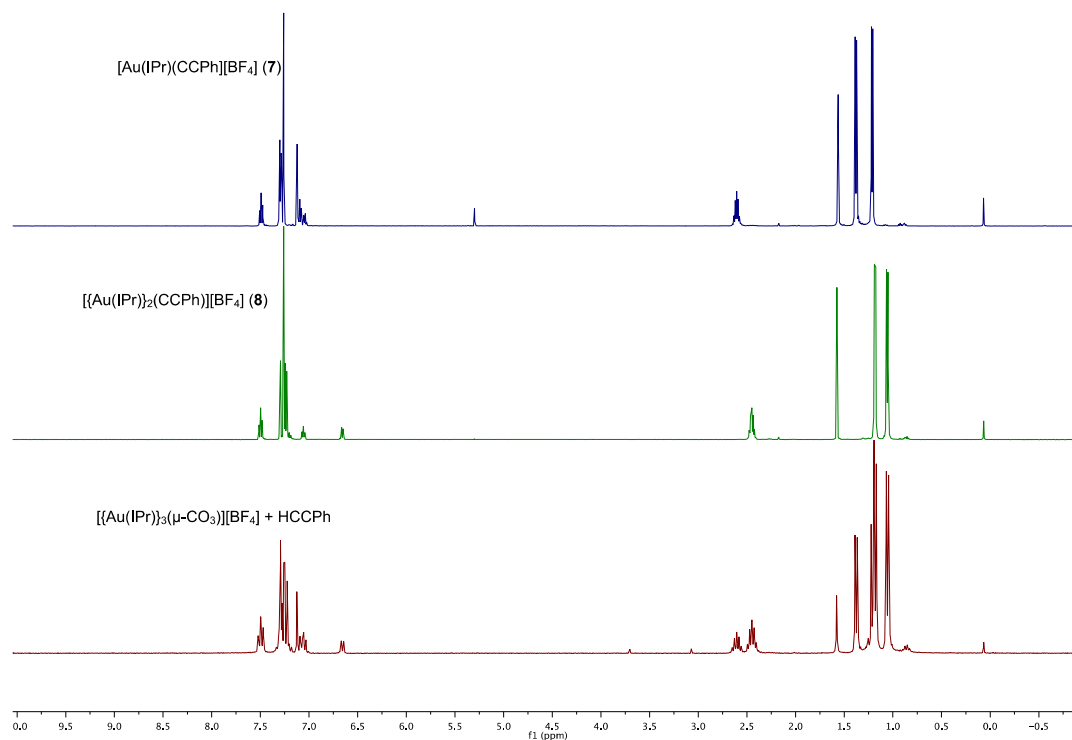

### Catalytic experiments :

*[{Au(IPr)}<sub>2</sub>(μ-OH)][BF<sub>4</sub>] under air:*  $[Au(IPr)]_2(\mu-OH)[BF_4]$  (3.2 mg, 2.5 μmol, 0.5 mol%) was added to a solution of alkyne (89 mg, 0.5 mmol) and phenol (52 mg, 0.55 mmol, 1.1 equiv.) in toluene (1 mL). The reaction mixture was stirred at 80 °C for 1 h. After this time an aliquot was analyzed by GC.

*[{Au(IPr)}<sub>2</sub>(μ-OH)][BF<sub>4</sub>] under CO<sub>2</sub>:*  $[Au(IPr)]_2(\mu-OH)[BF_4]$  (3.2 mg, 2.5 μmol, 0.5 mol%) was added to a solution of alkyne (89 mg, 0.5 mmol) and phenol (52 mg, 0.55 mmol, 1.1 equiv.) in toluene (1 mL) and CO<sub>2</sub> was bubbled through the solution for 5 min. The reaction mixture was stirred at 80 °C. After this time an aliquot was analyzed by GC.

*1 + 2 under air:* **1** (1 mg, 1.65 μmol, 0.33 mol%) + **2** (2.1 mg, 1.65 μmol, 0.33 mol%) was added to a solution of alkyne (89 mg, 0.5 mmol) and phenol (52 mg, 0.55 mmol, 1.1 equiv.) in toluene (1 mL). The reaction mixture was stirred at 80 °C for 1 h. After this time an aliquot was analyzed by GC.

**1 + 2 under CO<sub>2</sub>**: **1** (1 mg, 1.65 μmol, 0.33 mol%) + **2** (2.1 mg, 1.65 μmol, 0.33 mol%) was added to a solution of alkyne (89 mg, 0.5 mmol) and phenol (52 mg, 0.55 mmol, 1.1 equiv.) in toluene (1 mL) and CO<sub>2</sub> was bubbled through the solution for 5 min. The reaction mixture was stirred at 80 °C for 1 h. After this time an aliquot was analyzed by GC.

**3 under air**: **3** (3.1 mg, 1.62 μmol, 0.33 mol%) was added to a solution of alkyne (89 mg, 0.5 mmol) and phenol (52 mg, 0.55 mmol, 1.1 equiv.) in toluene (1 mL). The reaction mixture was stirred at 80 °C for 1 h. After this time an aliquot was analyzed by GC.

**3 under CO<sub>2</sub>**: **3** (3.1 mg, 1.62 μmol, 0.33 mol%) was added to a solution of alkyne (89 mg, 0.5 mmol) and phenol (52 mg, 0.55 mmol, 1.1 equiv.) in toluene (1 mL) and CO<sub>2</sub> was bubbled through the solution for 5 min. The reaction mixture was stirred at 80 °C for 1 h. After this time an aliquot was analyzed by GC.

- **DFT Calculations.**

Geometries were fully optimized at the PBE0/ECP1 level of theory, i.e. using the PBE hybrid functional,<sup>4</sup> a fine integration grid (75 radial shells with 302 angular points per shell), the Stuttgart-Dresden effective core potential (together with its [6s5p3d] valence basis) on Au,<sup>5</sup> and 6-31G\*(\*) basis on the ligands (6-31G\* on the iPr and Ph groups, 6-31G\*\* elsewhere).<sup>6</sup> Minima were characterized by the harmonic vibrational frequencies computed at that level, which were also used to evaluate standard thermodynamic corrections at ambient temperature and pressure. Refined energies were obtained through single-point calculations at the PBE0-D3/ECP2 level, i.e. including Grimme's three-body dispersion correction,<sup>7</sup> the same SDD core potential and valence basis as above on Au, 6-31G\* basis on the C<sub>6</sub>H<sub>3</sub>(iPr)<sub>2</sub> groups, and 6-311+G\*\* basis elsewhere, in conjunction with the polarizable continuum model (PCM) by Tomasi and coworkers employing the parameters of dichloromethane (and the default settings in Gaussian09),<sup>8</sup>. These and similar levels have performed well in the computation of structures and reaction profiles of 5d and late transition metal complexes.<sup>9</sup> Enthalpies  $\Delta H$  and free energies  $\Delta G$  were obtained by adding the PBE0/ECP1 thermodynamic corrections to the PBE0-D3/ECP2 single point energies. Atomic charges were obtained from natural population analysis<sup>10</sup> of the PBE0/ECP2/PCM wavefunctions. All computations employed the Gaussian suite of programs.<sup>11</sup>

---

<sup>(4)</sup> (a) Perdew, J. P.; Burke, K.; Ernzerhof, M., *Phys. Rev. Lett.* **1996**, *77*, 3865-3868; (b) Adamo, C.; Barone, V. *J. Chem. Phys.* **1999**, *110*, 6158-6170.

<sup>(5)</sup> Dolg, M.; Wedig, U.; Stoll H.; Preuss, H. *J. Chem. Phys.* **1987**, *86*, 866-872.

<sup>(6)</sup> (a) Hehre, W. J.; Ditchfield, R.; Pople, J. A. *J. Chem. Phys.* **1972**, *56*, 2257-2261. (b) Hariharan P. C.; Pople, J. A. *Theor. Chim. Acta.*, **1973**, *28*, 213-222.

<sup>(7)</sup> Grimme, S.; Antony, J.; Ehrlich, S.; Krieg, H. *J. Chem. Phys.* **2010**, *132*, 154104.

<sup>(8)</sup> (a) Barone, V.; Cossi, M.; Tomasi, J. *J. Comput. Chem.* **1998**, *19*, 404-417; (b) Cossi, M.; Scalmani, G.; Rega, N.; Barone, V. *J. Chem. Phys.* **2002**, *117*, 43-54; (c) Cossi, M.; Crescenzi, O. *J. Chem. Phys.* **2003**, *119*, 8863-8872; review: (d) Tomasi, J.; Mennucci, B.; Cammi, R. *Chem. Rev.* **2005**, *105*, 2999-3093.

<sup>(9)</sup> See e.g.: (a) Bühl, M.; Reimann, C.; Pantazis, D. A.; Bredow, T.; Neese, F. *J. Chem. Theory Comput.* **2008**, *4*, 1449-1459. (b) Quintal, M. M.; Karton, A.; Iron, M. A.; Boese, A. D.; Martin, J. M. L. *J. Phys. Chem. A* **2006**, *110*, 709-716.

<sup>(10)</sup> Reed, A. E.; Curtiss, L. A.; Weinhold, F. *Chem. Rev.* **1988**, *88*, 899-926.

<sup>(11)</sup> (a) M. J. Frisch, G. W. Trucks, H. B. Schlegel, G. E. Scuseria, M. A. Robb, J. R. Cheeseman, J. A. Montgomery, Jr., T. Vreven, K. N. Kudin, J. C. Burant, J. M. Millam, S. S. Iyengar, J. Tomasi, V. Barone, B. Mennucci, M. Cossi, G. Scalmani, N. Rega, G. A. Petersson, H. Nakatsuji, M. Hada, M. Ehara, K. Toyota, R. Fukuda, J. Hasegawa, M. Ishida, T. Nakajima, Y. Honda, O. Kitao, H. Nakai, M. Klene, X. Li, J. E. Knox, H. P. Hratchian, J. B. Cross, C. Adamo, J. Jaramillo, R. Gomperts, R. E. Stratmann, O. Yazyev, A. J. Austin, R. Cammi, C. Pomelli, J. W. Ochterski, P. Y. Ayala, K. Morokuma, G. A. Voth, P. Salvador, J. J. Dannenberg, V. G. Zakrzewski, S. Dapprich, A. D. Daniels, M. C. Strain, O. Farkas, D. K. Malick, A. D. Rabuck, K. Raghavachari, J. B. Foresman, J. V. Ortiz, Q. Cui, A. G. Baboul, S. Clifford, J. Cioslowski, B. B. Stefanov, G. Liu, A. Liashenko, P. Piskorz, I.

## Optimized Geometries:

Cartesian coordinates of all compounds, PBE0/ECP1 optimized (xyz format in Å)

```
3
CO2
C 0.000000 0.000000 0.000000
O 0.000000 0.000000 1.165689
O 0.000000 0.000000 -1.165689

3
H2O
O 0.000000 0.000000 0.110812
H 0.000000 0.783976 -0.443248
H 0.000000 -0.783976 -0.443248

136
[IPr2Au2CO3]
Au 2.192019 -0.124214 -0.301590
Au -2.647754 -0.378590 -0.948180
C 4.104195 0.128586 0.104812
N 5.122851 -0.720638 -0.185394
C 6.341653 -0.181324 0.179012
H 7.267483 -0.712154 0.024940
C 6.084216 1.035996 0.714231
H 6.737964 1.789503 1.123596
N 4.712849 1.208377 0.661392
C 4.958438 -2.011938 -0.793779
C 4.799463 -3.127251 0.043464
C 4.659145 -4.373681 -0.568731
H 4.524909 -5.258691 0.047881
C 4.677575 -4.497061 -1.952148
H 4.562160 -5.475808 -2.410156
C 4.830973 -3.373098 -2.752695
H 4.829628 -3.479597 -3.833616
C 4.970051 -2.100977 -2.194284
C 4.743531 -3.013721 1.555355
H 4.950990 -1.972623 1.827801
C 3.340489 -3.347644 2.072796
H 2.589303 -2.694150 1.616420
H 3.295095 -3.222036 3.161523
H 3.070776 -4.385076 1.842131
C 5.807453 -3.882533 2.231847
H 6.814488 -3.630470 1.881115
H 5.642862 -4.947800 2.033664
H 5.779041 -3.741524 3.318568
C 5.142986 -0.891102 -3.092137
H 5.066233 0.006383 -2.467758
C 6.536411 -0.894262 -3.731637
H 6.671609 -0.003971 -4.356811
H 6.672334 -1.775116 -4.370525
H 7.331845 -0.904883 -2.976738
C 4.041124 -0.797018 -4.151207
H 4.161012 0.132207 -4.721544
H 3.042725 -0.802663 -3.700643
H 4.102135 -1.625248 -4.867787
C 4.029281 2.380662 1.126837
```

---

Komaromi, R. L. Martin, D. J. Fox, T. Keith, M. A. Al-Laham, C. Y. Peng, A. Nanayakkara, M. Challacombe, P. M. W. Gill, B. Johnson, W. Chen, M. W. Wong, C. Gonzalez, and J. A. Pople, Gaussian 03, Revision E.01, Gaussian, Inc., Pittsburgh PA, 2003; (b) M. J. Frisch, G. W. Trucks, H. B. Schlegel, G. E. Scuseria, M. A. Robb, J. R. Cheeseman, G. Scalmani, V. Barone, B. Mennucci, G. A. Petersson, H. Nakatsuji, M. Caricato, X. Li, H. P. Hratchian, A. F. Izmaylov, J. Bloino, G. Zheng, J. L. Sonnenberg, M. Hada, K. Ehara, K. Toyota, R. Fukuda, J. Hasegawa, M. Ishida, T. Nakajima, Y. Honda, O. Kitao, H. Nakai, T. Vreven, J. A. Montgomery, Jr., J. E. Peralta, F. Ogliaro, M. Bearpark, J. J. Heyd, E. Brothers, K. N. Kudin, V. N. Staroverov, R. Kobayashi, J. Normand, K. Raghavachari, A. Rendell, J. C. Burant, S. S. Iyengar, J. Tomasi, M. Cossi, N. Rega, J. M. Millam, M. Klene, J. E. Knox, J. B. Cross, V. Bakken, C. Adamo, J. Jaramillo, R. Gomperts, R. E. Stratmann, O. Yazyev, A. J. Austin, R. Cammi, C. Pomelli, J. W. Ochterski, R. L. Martin, K. Morokuma, V. G. Zakrzewski, G. A. Voth, P. Salvador, J. J. Dannenberg, S. Dapprich, A. D. Daniels, O. Farkas, J. B. Foresman, J. V. Ortiz, J. Cioslowski, and D. J. Fox, Gaussian 09, Revision A.02, Gaussian, Inc., Wallingford CT, 2009.

|   |           |           |           |
|---|-----------|-----------|-----------|
| C | 3.798379  | 3.427907  | 0.221833  |
| C | 3.147341  | 4.563734  | 0.708778  |
| H | 2.950369  | 5.392062  | 0.033365  |
| C | 2.744550  | 4.647563  | 2.035129  |
| H | 2.238847  | 5.540677  | 2.392896  |
| C | 2.983156  | 3.591344  | 2.905671  |
| H | 2.655763  | 3.663175  | 3.939517  |
| C | 3.631014  | 2.433384  | 2.471937  |
| C | 4.212407  | 3.359722  | -1.235762 |
| H | 4.710471  | 2.398942  | -1.405161 |
| C | 2.991184  | 3.404797  | -2.159490 |
| H | 2.299667  | 2.584398  | -1.941118 |
| H | 3.304990  | 3.314180  | -3.205638 |
| H | 2.446065  | 4.350426  | -2.054027 |
| C | 5.215848  | 4.464405  | -1.581416 |
| H | 6.104972  | 4.415497  | -0.942435 |
| H | 4.773350  | 5.460285  | -1.461559 |
| H | 5.539388  | 4.369677  | -2.624172 |
| C | 3.843788  | 1.275807  | 3.428957  |
| H | 4.460528  | 0.525078  | 2.922411  |
| C | 2.506579  | 0.610029  | 3.770486  |
| H | 2.666683  | -0.255341 | 4.424906  |
| H | 1.998632  | 0.268326  | 2.861927  |
| H | 1.841566  | 1.308762  | 4.292818  |
| C | 4.593179  | 1.703701  | 4.693456  |
| H | 4.784299  | 0.833826  | 5.332100  |
| H | 4.014294  | 2.422945  | 5.284164  |
| H | 5.556095  | 2.167791  | 4.452783  |
| C | -4.062012 | 0.036878  | 0.359109  |
| N | -4.656693 | -0.809477 | 1.238726  |
| C | -5.570863 | -0.142401 | 2.032835  |
| H | -6.143410 | -0.650074 | 2.792592  |
| C | -5.550013 | 1.154568  | 1.642194  |
| H | -6.100860 | 2.014092  | 1.989311  |
| N | -4.623625 | 1.245349  | 0.620224  |
| C | -4.357936 | -2.209838 | 1.344368  |
| C | -3.321424 | -2.610848 | 2.201588  |
| C | -3.056697 | -3.979082 | 2.288578  |
| H | -2.255384 | -4.324233 | 2.936319  |
| C | -3.790449 | -4.900964 | 1.553805  |
| H | -3.563935 | -5.960897 | 1.633196  |
| C | -4.807113 | -4.471626 | 0.710438  |
| H | -5.366488 | -5.200108 | 0.129671  |
| C | -5.114141 | -3.115673 | 0.584302  |
| C | -2.490906 | -1.627989 | 3.005091  |
| H | -2.879932 | -0.620468 | 2.820199  |
| C | -1.025789 | -1.638666 | 2.555127  |
| H | -0.919598 | -1.372557 | 1.497597  |
| H | -0.572222 | -2.626092 | 2.705918  |
| H | -0.449711 | -0.915120 | 3.144874  |
| C | -2.614035 | -1.896566 | 4.508366  |
| H | -3.658315 | -1.868769 | 4.840201  |
| H | -2.055277 | -1.142642 | 5.074728  |
| H | -2.205533 | -2.878459 | 4.774266  |
| C | -6.199647 | -2.670355 | -0.377122 |
| H | -6.339523 | -1.590035 | -0.258037 |
| C | -7.542348 | -3.340825 | -0.074248 |
| H | -7.863572 | -3.152289 | 0.956341  |
| H | -7.491703 | -4.426577 | -0.215030 |
| H | -8.316885 | -2.958270 | -0.748811 |
| C | -5.767446 | -2.916601 | -1.826605 |
| H | -4.825084 | -2.403740 | -2.047292 |
| H | -6.532987 | -2.549893 | -2.520786 |
| H | -5.622940 | -3.986208 | -2.019427 |
| C | -4.292442 | 2.461007  | -0.068341 |
| C | -5.046452 | 2.814756  | -1.198095 |
| C | -4.712083 | 4.005319  | -1.845464 |
| H | -5.268236 | 4.305735  | -2.729359 |
| C | -3.671792 | 4.802710  | -1.386039 |
| H | -3.424585 | 5.723722  | -1.907369 |
| C | -2.940709 | 4.422041  | -0.268535 |
| H | -2.120909 | 5.047149  | 0.075114  |
| C | -3.231188 | 3.240815  | 0.417559  |
| C | -6.156435 | 1.938769  | -1.747578 |
| H | -6.323865 | 1.116303  | -1.042978 |



|   |           |           |           |
|---|-----------|-----------|-----------|
| C | -5.735664 | 1.316398  | -3.083304 |
| H | -4.811382 | 0.739057  | -2.973082 |
| H | -5.562290 | 2.089188  | -3.841520 |
| H | -6.520180 | 0.647717  | -3.457240 |
| C | -7.477069 | 2.702130  | -1.879518 |
| H | -8.270902 | 2.028000  | -2.220994 |
| H | -7.401786 | 3.515969  | -2.609781 |
| H | -7.787555 | 3.138527  | -0.923500 |
| C | -2.404216 | 2.844485  | 1.625748  |
| H | -2.801008 | 1.900364  | 2.015765  |
| C | -2.523281 | 3.885974  | 2.743250  |
| H | -3.566752 | 4.045713  | 3.038577  |
| H | -2.112703 | 4.854131  | 2.433250  |
| H | -1.964447 | 3.557947  | 3.627325  |
| C | -0.940221 | 2.599262  | 1.245367  |
| H | -0.841261 | 1.809227  | 0.493115  |
| H | -0.368250 | 2.293772  | 2.129764  |
| H | -0.471716 | 3.509146  | 0.850986  |
| C | 0.015138  | -0.673102 | -1.974890 |
| O | 0.956851  | -0.830568 | -2.758488 |
| O | -1.235495 | -0.808071 | -2.343849 |
| O | 0.198015  | -0.350075 | -0.693584 |

202

[Au<sub>3</sub>IPr<sub>3</sub>CO<sub>3</sub>]<sup>+</sup>

|    |          |          |          |
|----|----------|----------|----------|
| Au | 0.50724  | 19.02742 | 8.51958  |
| Au | -4.60258 | 19.15113 | 9.19822  |
| Au | -1.65131 | 19.75648 | 12.99603 |
| O  | -1.47332 | 19.08045 | 8.97838  |
| O  | -0.95536 | 19.56967 | 11.07163 |
| O  | -3.08237 | 19.19966 | 10.52363 |
| N  | -7.40833 | 19.95442 | 8.13725  |
| N  | -6.34563 | 18.48819 | 6.85645  |
| N  | 3.14031  | 17.86068 | 7.69439  |
| N  | -2.80638 | 20.76757 | 15.60224 |
| N  | 3.22873  | 19.99837 | 7.81546  |
| N  | -2.27789 | 18.68287 | 15.63410 |
| C  | -8.55025 | 21.67696 | 11.12261 |
| H  | -9.08234 | 21.49170 | 11.85859 |
| C  | -5.36094 | 15.92736 | 15.19123 |
| H  | -5.45594 | 15.23807 | 14.52853 |
| H  | -6.21833 | 16.32203 | 15.36647 |
| H  | -5.01057 | 15.54887 | 16.00050 |
| C  | -3.52308 | 17.12524 | 4.97347  |
| H  | -2.80349 | 17.42585 | 4.46689  |
| C  | 2.14953  | 23.96357 | 8.46542  |
| H  | 1.90549  | 24.84850 | 8.61198  |
| C  | -2.94626 | 22.15161 | 15.21354 |
| C  | 0.40768  | 22.50543 | 15.58312 |
| H  | 0.84996  | 23.35791 | 15.58312 |
| H  | 0.10966  | 22.30029 | 14.69421 |
| H  | 1.01881  | 21.82674 | 15.87943 |
| C  | -3.17775 | 20.29438 | 16.81614 |
| H  | -3.55887 | 20.78876 | 17.50433 |
| C  | -2.95833 | 16.56148 | 14.69102 |
| C  | 4.76234  | 15.78538 | 10.67974 |
| H  | 5.18532  | 16.27456 | 11.38705 |
| H  | 5.37835  | 15.68149 | 9.95013  |
| H  | 4.49650  | 14.92024 | 10.99835 |
| C  | -3.70458 | 15.77970 | 5.11047  |
| H  | -3.11383 | 15.18070 | 4.71540  |
| C  | -0.77051 | 22.55739 | 16.50390 |
| H  | -0.95807 | 21.63351 | 16.77472 |
| C  | -2.66624 | 20.01081 | 5.67760  |
| H  | -2.04284 | 19.45182 | 5.20924  |
| H  | -2.49945 | 19.95261 | 6.62386  |
| H  | -2.56127 | 20.91999 | 5.39085  |
| C  | -4.78446 | 17.48981 | 13.24773 |
| H  | -4.77693 | 16.75136 | 12.63600 |
| H  | -4.13846 | 18.14375 | 12.97054 |
| H  | -5.65847 | 17.88624 | 13.26047 |
| C  | -4.01163 | 22.51935 | 14.41383 |
| C  | -2.52372 | 15.29273 | 14.16532 |
| H  | -3.14383 | 14.68044 | 13.83715 |
| C  | -0.21118 | 15.83311 | 14.60818 |

|   |          |          |          |
|---|----------|----------|----------|
| H | 0.68527  | 15.59344 | 14.56039 |
| C | -4.57834 | 22.89118 | 8.30293  |
| H | -3.96001 | 22.86128 | 7.56694  |
| H | -4.32197 | 22.24096 | 8.96245  |
| H | -4.56690 | 23.76760 | 8.69481  |
| C | -3.19585 | 24.83290 | 14.64960 |
| H | -3.27898 | 25.73795 | 14.45206 |
| C | -4.93750 | 21.41691 | 12.29190 |
| H | -5.19370 | 22.25360 | 11.90001 |
| H | -5.54784 | 20.73133 | 12.01153 |
| H | -4.04793 | 21.18968 | 12.00834 |
| C | -4.13843 | 23.87646 | 14.13027 |
| H | -4.84083 | 24.16987 | 13.59820 |
| C | 2.45444  | 16.11442 | 4.23430  |
| H | 3.38578  | 15.99763 | 4.43821  |
| H | 2.36466  | 16.71141 | 3.48876  |
| H | 2.06644  | 15.26494 | 4.01128  |
| C | 4.64485  | 21.42619 | 11.05570 |
| H | 4.62346  | 22.36140 | 11.26917 |
| H | 5.29912  | 21.26889 | 10.37069 |
| H | 4.87366  | 20.92314 | 11.83948 |
| C | -2.16186 | 24.36997 | 15.45568 |
| H | -1.56854 | 24.98718 | 15.81571 |
| C | -1.19994 | 15.00062 | 14.15257 |
| H | -0.94232 | 14.17642 | 13.80848 |
| C | 1.18069  | 21.14487 | 5.06906  |
| H | 0.58541  | 21.89591 | 5.02445  |
| H | 0.83756  | 20.50014 | 5.69034  |
| H | 1.25338  | 20.74383 | 4.19925  |
| C | -6.55031 | 23.74368 | 6.96477  |
| H | -6.58789 | 24.53129 | 7.50959  |
| H | -7.43023 | 23.52978 | 6.64617  |
| H | -5.96994 | 23.90090 | 6.21604  |
| C | 1.10158  | 17.48407 | 16.89897 |
| H | 0.43450  | 17.19404 | 17.52663 |
| H | 1.62237  | 18.18934 | 17.29086 |
| H | 1.67490  | 16.74706 | 16.67595 |
| C | 3.13689  | 22.58474 | 4.48282  |
| H | 2.92665  | 22.26096 | 3.60664  |
| H | 4.08891  | 22.64452 | 4.58477  |
| H | 2.74611  | 23.45399 | 4.60707  |
| C | -7.58590 | 14.55673 | 6.61430  |
| H | -7.02221 | 13.78532 | 6.52191  |
| H | -7.86189 | 14.85952 | 5.74769  |
| H | -8.36067 | 14.32492 | 7.13364  |
| C | -6.45060 | 21.91765 | 14.20674 |
| H | -6.57608 | 21.75120 | 15.14344 |
| H | -7.07212 | 21.38665 | 13.70333 |
| H | -6.60448 | 22.84717 | 14.02513 |
| C | -4.47904 | 19.93997 | 3.96030  |
| H | -4.71315 | 20.87099 | 3.94118  |
| H | -5.22785 | 19.41705 | 3.66718  |
| H | -3.73392 | 19.78736 | 3.37406  |
| C | -0.56591 | 23.35728 | 17.78152 |
| H | 0.19526  | 23.01424 | 18.25624 |
| H | -1.34640 | 23.28328 | 18.33590 |
| H | -0.41605 | 24.27925 | 17.56168 |
| C | -6.22646 | 15.30278 | 8.66614  |
| H | -6.94116 | 15.14085 | 9.28424  |
| H | -5.67038 | 16.01091 | 8.99749  |
| H | -5.70217 | 14.50430 | 8.56737  |
| C | 1.72371  | 16.71051 | 5.46413  |
| H | 2.06690  | 17.62051 | 5.58839  |
| C | 2.27129  | 20.97534 | 11.59733 |
| H | 2.55598  | 20.37699 | 12.29190 |
| H | 1.42325  | 20.68576 | 11.25324 |
| H | 2.18512  | 21.86182 | 11.95418 |
| C | -8.28484 | 20.69916 | 10.18590 |
| C | 3.23700  | 20.97766 | 10.54274 |
| H | 3.32539  | 20.05407 | 10.23051 |
| C | 0.45343  | 17.97359 | 15.70101 |
| H | 0.01090  | 18.81299 | 15.94315 |
| C | -0.61538 | 17.05949 | 15.14982 |
| C | -4.75361 | 15.33199 | 5.83053  |
| H | -4.88607 | 14.41439 | 5.89425  |

|   |           |          |          |
|---|-----------|----------|----------|
| C | -1.94786  | 17.40279 | 15.17212 |
| C | 2.57264   | 21.61942 | 5.53422  |
| H | 3.15944   | 20.83216 | 5.55015  |
| C | -1.97891  | 23.03927 | 15.73605 |
| C | -4.10170  | 19.53874 | 5.38129  |
| H | -4.70572  | 20.00630 | 5.99620  |
| C | 2.56540   | 16.81071 | 11.29147 |
| H | 2.10370   | 15.99893 | 11.51768 |
| H | 1.93071   | 17.46821 | 10.99517 |
| H | 3.02944   | 17.13991 | 12.06569 |
| C | -8.21715  | 18.66469 | 11.60689 |
| H | -7.26570  | 18.76598 | 11.52406 |
| H | -8.43724  | 17.73009 | 11.62920 |
| H | -8.51334  | 19.08294 | 12.41934 |
| C | -4.96953  | 21.53411 | 13.79255 |
| H | -4.77321  | 20.65013 | 14.16850 |
| C | -4.42554  | 16.97939 | 14.68465 |
| H | -4.50541  | 17.74621 | 15.29000 |
| C | 1.55435   | 18.33060 | 14.65279 |
| H | 2.12731   | 19.01171 | 15.00963 |
| H | 1.13944   | 18.65009 | 13.84671 |
| H | 2.07440   | 17.54700 | 14.45525 |
| C | 2.38891   | 18.95733 | 7.97158  |
| C | -6.19625  | 19.18520 | 7.97476  |
| C | 4.45974   | 19.57535 | 7.37259  |
| H | 5.17412   | 20.12111 | 7.13364  |
| C | -2.88877  | 18.96989 | 16.84162 |
| H | -3.06734  | 18.37349 | 17.53300 |
| C | -1.86165  | 19.21164 | 10.17953 |
| C | 2.65721   | 16.52129 | 7.80271  |
| C | 4.44489   | 18.22636 | 7.35029  |
| H | 5.15491   | 17.66019 | 7.14638  |
| C | -8.04730  | 19.77673 | 7.02531  |
| H | -8.79894  | 20.27195 | 6.78635  |
| C | -5.40457  | 17.55744 | 6.27658  |
| C | -10.41179 | 19.36040 | 10.54593 |
| H | -10.65817 | 19.96922 | 11.24687 |
| H | -10.74011 | 18.48177 | 10.75621 |
| H | -10.79266 | 19.65444 | 9.71755  |
| C | -7.48361  | 20.95703 | 9.10263  |
| C | -7.54654  | 18.84512 | 6.27658  |
| H | -7.92180  | 18.48983 | 5.50236  |
| C | -2.27541  | 19.75937 | 14.86944 |
| C | 2.86475   | 21.37661 | 8.03211  |
| C | 1.56840   | 14.63169 | 6.87238  |
| H | 1.11855   | 14.20968 | 6.17781  |
| C | 2.46931   | 14.53167 | 9.10263  |
| H | 2.60858   | 14.04687 | 9.88322  |
| C | 2.46470   | 23.16646 | 9.51364  |
| H | 2.42877   | 23.52315 | 10.37069 |
| C | -6.88574  | 22.26249 | 8.97519  |
| C | 2.89788   | 15.83813 | 8.99749  |
| C | 2.84619   | 21.80883 | 9.35115  |
| C | 3.54365   | 16.54079 | 10.20502 |
| H | 3.85909   | 17.41245 | 9.88641  |
| C | 2.53731   | 22.17658 | 6.92335  |
| C | -6.79521  | 15.69467 | 7.33754  |
| H | -7.40586  | 16.44821 | 7.47773  |
| C | 1.82765   | 13.96250 | 8.02574  |
| H | 1.55895   | 13.07424 | 8.08946  |
| C | 1.98610   | 15.96876 | 6.73856  |
| C | -5.64307  | 16.17285 | 6.47730  |
| C | 2.18545   | 23.48547 | 7.21329  |
| H | 1.96467   | 24.05512 | 6.51235  |
| C | -8.90091  | 19.31755 | 10.42167 |
| H | -8.69445  | 18.77285 | 9.63471  |
| C | -7.17942  | 23.21157 | 9.88960  |
| H | -6.81450  | 24.06166 | 9.80039  |
| C | -8.00336  | 22.94551 | 10.94100 |
| H | -8.20285  | 23.61909 | 11.54954 |
| C | 0.22452   | 16.83374 | 5.19650  |
| H | 0.08285   | 17.37265 | 4.41272  |
| H | -0.20306  | 17.24833 | 5.94841  |
| H | -0.14833  | 15.96121 | 5.05631  |
| C | -6.00570  | 22.57305 | 7.78997  |

|   |          |          |         |
|---|----------|----------|---------|
| H | -5.96187 | 21.78020 | 7.21647 |
| C | -4.34185 | 18.04131 | 5.53741 |

134

[Au<sub>2</sub>(IPr)<sub>2</sub>OH]<sup>+</sup>

|    |           |           |           |
|----|-----------|-----------|-----------|
| Au | -1.892291 | -0.553365 | -0.226866 |
| O  | -0.003214 | -1.324530 | -0.514737 |
| H  | 0.001585  | -2.283710 | -0.451134 |
| Au | 1.872326  | -0.540554 | -0.168838 |
| C  | -3.728056 | 0.132917  | 0.000421  |
| N  | -4.822255 | -0.591689 | 0.334501  |
| C  | -5.943650 | 0.212418  | 0.387838  |
| H  | -6.915450 | -0.182787 | 0.637630  |
| C  | -5.537642 | 1.468143  | 0.079118  |
| H  | -6.081243 | 2.396596  | 0.005115  |
| N  | -4.177649 | 1.400175  | -0.155061 |
| C  | -4.820646 | -2.008377 | 0.582566  |
| C  | -5.050012 | -2.874375 | -0.498754 |
| C  | -5.036956 | -4.244969 | -0.231848 |
| H  | -5.208455 | -4.946395 | -1.043836 |
| C  | -4.810883 | -4.724241 | 1.052347  |
| H  | -4.807725 | -5.794807 | 1.237692  |
| C  | -4.595728 | -3.839579 | 2.101631  |
| H  | -4.425427 | -4.226387 | 3.102690  |
| C  | -4.596475 | -2.458668 | 1.893215  |
| C  | -5.298775 | -2.381106 | -1.912166 |
| H  | -5.305432 | -1.285111 | -1.897972 |
| C  | -4.172298 | -2.816655 | -2.854876 |
| H  | -3.201088 | -2.445375 | -2.508490 |
| H  | -4.348438 | -2.426362 | -3.863726 |
| H  | -4.111615 | -3.908683 | -2.926081 |
| C  | -6.664682 | -2.839822 | -2.432243 |
| H  | -7.476789 | -2.509715 | -1.775551 |
| H  | -6.720311 | -3.931523 | -2.507116 |
| H  | -6.847039 | -2.430485 | -3.431984 |
| C  | -4.360408 | -1.516937 | 3.059425  |
| H  | -4.414871 | -0.487856 | 2.686159  |
| C  | -5.445165 | -1.674942 | 4.129682  |
| H  | -5.289294 | -0.953207 | 4.939158  |
| H  | -5.428383 | -2.677244 | 4.572056  |
| H  | -6.445774 | -1.511186 | 3.715255  |
| C  | -2.962814 | -1.711907 | 3.655579  |
| H  | -2.795166 | -0.998709 | 4.470716  |
| H  | -2.184400 | -1.558368 | 2.899706  |
| H  | -2.841632 | -2.720830 | 4.066148  |
| C  | -3.361157 | 2.527955  | -0.513733 |
| C  | -2.798944 | 3.297206  | 0.517320  |
| C  | -2.020134 | 4.393334  | 0.141993  |
| H  | -1.565403 | 5.010213  | 0.911714  |
| C  | -1.818986 | 4.705984  | -1.196628 |
| H  | -1.216893 | 5.569580  | -1.466469 |
| C  | -2.392095 | 3.925391  | -2.192284 |
| H  | -2.231012 | 4.181827  | -3.235791 |
| C  | -3.179174 | 2.816083  | -1.875509 |
| C  | -2.992972 | 2.967879  | 1.985649  |
| H  | -3.720288 | 2.151337  | 2.060807  |
| C  | -1.683206 | 2.471976  | 2.607568  |
| H  | -1.306695 | 1.586682  | 2.082733  |
| H  | -1.837042 | 2.208916  | 3.660776  |
| H  | -0.904655 | 3.242089  | 2.560425  |
| C  | -3.563658 | 4.155515  | 2.766066  |
| H  | -4.505948 | 4.506990  | 2.332270  |
| H  | -2.867900 | 5.001792  | 2.781901  |
| H  | -3.754134 | 3.867949  | 3.805914  |
| C  | -3.789634 | 1.979607  | -2.983927 |
| H  | -4.397083 | 1.191169  | -2.524995 |
| C  | -2.702232 | 1.289854  | -3.814270 |
| H  | -3.157316 | 0.656197  | -4.584044 |
| H  | -2.062897 | 0.660718  | -3.184733 |
| H  | -2.062623 | 2.021796  | -4.320988 |
| C  | -4.718684 | 2.814277  | -3.870917 |
| H  | -5.190012 | 2.178887  | -4.628735 |
| H  | -4.170700 | 3.603878  | -4.397394 |
| H  | -5.511745 | 3.292148  | -3.285736 |
| C  | 3.713713  | 0.122483  | 0.088893  |

|   |          |           |           |
|---|----------|-----------|-----------|
| N | 4.842213 | -0.605528 | -0.091887 |
| C | 5.964238 | 0.161516  | 0.149459  |
| H | 6.960011 | -0.242357 | 0.058013  |
| C | 5.524696 | 1.397358  | 0.489119  |
| H | 6.056747 | 2.296534  | 0.756320  |
| N | 4.143765 | 1.354857  | 0.447559  |
| C | 4.871355 | -1.991941 | -0.473759 |
| C | 4.894264 | -2.309434 | -1.841112 |
| C | 4.920354 | -3.664051 | -2.179621 |
| H | 4.938582 | -3.950655 | -3.227653 |
| C | 4.927053 | -4.649265 | -1.200169 |
| H | 4.950194 | -5.696945 | -1.487090 |
| C | 4.911399 | -4.300251 | 0.144517  |
| H | 4.921797 | -5.080149 | 0.901194  |
| C | 4.884575 | -2.961778 | 0.541576  |
| C | 4.893360 | -1.255509 | -2.932607 |
| H | 4.880233 | -0.267936 | -2.457032 |
| C | 3.636490 | -1.357878 | -3.802327 |
| H | 2.727487 | -1.262045 | -3.197916 |
| H | 3.592265 | -2.317529 | -4.329795 |
| H | 3.632203 | -0.563364 | -4.557243 |
| C | 6.164370 | -1.336803 | -3.784132 |
| H | 7.066591 | -1.236410 | -3.171103 |
| H | 6.171210 | -0.537961 | -4.533874 |
| H | 6.228770 | -2.291957 | -4.317134 |
| C | 4.865597 | -2.608873 | 2.017140  |
| H | 4.870721 | -1.516602 | 2.109592  |
| C | 6.113042 | -3.134457 | 2.734202  |
| H | 7.031386 | -2.752664 | 2.275218  |
| H | 6.158946 | -4.228894 | 2.709469  |
| H | 6.104446 | -2.827578 | 3.785927  |
| C | 3.585353 | -3.115834 | 2.688270  |
| H | 2.695145 | -2.705693 | 2.198221  |
| H | 3.564819 | -2.818693 | 3.742978  |
| H | 3.520355 | -4.209204 | 2.648988  |
| C | 3.306779 | 2.481145  | 0.760150  |
| C | 2.952333 | 2.694640  | 2.101926  |
| C | 2.189395 | 3.828996  | 2.387316  |
| H | 1.901442 | 4.031195  | 3.415309  |
| C | 1.802665 | 4.704842  | 1.380553  |
| H | 1.222925 | 5.590428  | 1.627579  |
| C | 2.162551 | 4.459039  | 0.061757  |
| H | 1.852511 | 5.150656  | -0.716820 |
| C | 2.926731 | 3.341826  | -0.281675 |
| C | 3.345830 | 1.744980  | 3.217944  |
| H | 4.019784 | 0.986980  | 2.802906  |
| C | 2.115234 | 1.010740  | 3.760966  |
| H | 1.603361 | 0.457053  | 2.965908  |
| H | 1.397094 | 1.712798  | 4.200704  |
| H | 2.409478 | 0.299421  | 4.541314  |
| C | 4.103448 | 2.462382  | 4.339058  |
| H | 4.430793 | 1.740621  | 5.095301  |
| H | 3.473682 | 3.203248  | 4.844050  |
| H | 4.989426 | 2.981470  | 3.958015  |
| C | 3.308765 | 3.102101  | -1.730139 |
| H | 3.937479 | 2.205515  | -1.775706 |
| C | 4.130317 | 4.265333  | -2.294376 |
| H | 5.031764 | 4.447201  | -1.699269 |
| H | 3.551096 | 5.195314  | -2.314280 |
| H | 4.439578 | 4.047316  | -3.322503 |
| C | 2.067834 | 2.830942  | -2.586813 |
| H | 1.509657 | 1.965186  | -2.213434 |
| H | 2.359326 | 2.630634  | -3.624215 |
| H | 1.388359 | 3.690988  | -2.589522 |

68

[Au(IPr)OH]

|    |           |           |           |
|----|-----------|-----------|-----------|
| Au | -0.016872 | -0.086223 | 1.570527  |
| O  | -0.139290 | -0.229258 | 3.546027  |
| H  | 0.752795  | -0.231507 | 3.908361  |
| C  | 0.005910  | 0.025679  | -0.401276 |
| N  | -1.063767 | 0.060215  | -1.240956 |
| C  | -0.662377 | 0.118777  | -2.563121 |
| H  | -1.373303 | 0.152613  | -3.373229 |
| C  | 0.691205  | 0.121489  | -2.557644 |

|   |           |           |           |
|---|-----------|-----------|-----------|
| H | 1.408752  | 0.157863  | -3.361748 |
| N | 1.082236  | 0.064145  | -1.231833 |
| C | -2.434859 | 0.041420  | -0.816684 |
| C | -3.069459 | -1.198773 | -0.646193 |
| C | -4.407609 | -1.185695 | -0.248145 |
| H | -4.926946 | -2.128715 | -0.099999 |
| C | -5.079402 | 0.009793  | -0.028256 |
| H | -6.119745 | -0.002886 | 0.285548  |
| C | -4.422426 | 1.221402  | -0.199947 |
| H | -4.952964 | 2.151420  | -0.013645 |
| C | -3.084690 | 1.266001  | -0.596540 |
| C | -2.354330 | -2.520269 | -0.852374 |
| H | -1.332182 | -2.306079 | -1.183872 |
| C | -3.025711 | -3.358854 | -1.944079 |
| H | -3.068592 | -2.819666 | -2.897154 |
| H | -4.051338 | -3.629564 | -1.667816 |
| H | -2.470030 | -4.290041 | -2.103471 |
| C | -2.252738 | -3.297474 | 0.464070  |
| H | -1.744609 | -2.705934 | 1.233128  |
| H | -1.689139 | -4.225897 | 0.313571  |
| H | -3.245118 | -3.567146 | 0.844312  |
| C | -2.382098 | 2.602046  | -0.743465 |
| H | -1.363790 | 2.414481  | -1.101853 |
| C | -2.263878 | 3.305273  | 0.612697  |
| H | -1.741010 | 2.673584  | 1.338628  |
| H | -3.251724 | 3.545793  | 1.023094  |
| H | -1.707860 | 4.244416  | 0.506825  |
| C | -3.074755 | 3.495127  | -1.776769 |
| H | -3.132766 | 3.006928  | -2.756130 |
| H | -2.524291 | 4.435315  | -1.896200 |
| H | -4.096069 | 3.747688  | -1.469419 |
| C | 2.450182  | 0.046432  | -0.799461 |
| C | 3.090019  | -1.193062 | -0.643627 |
| C | 4.425897  | -1.179788 | -0.237672 |
| H | 4.949299  | -2.122438 | -0.101591 |
| C | 5.091403  | 0.015683  | 0.001663  |
| H | 6.130820  | 0.003405  | 0.318757  |
| C | 4.430227  | 1.226704  | -0.158536 |
| H | 4.956689  | 2.156736  | 0.039325  |
| C | 3.094300  | 1.270752  | -0.561834 |
| C | 2.381484  | -2.514371 | -0.873591 |
| H | 1.365437  | -2.299443 | -1.222604 |
| C | 2.256309  | -3.300801 | 0.435184  |
| H | 1.725636  | -2.716461 | 1.194548  |
| H | 3.242217  | -3.565753 | 0.835393  |
| H | 1.702152  | -4.231855 | 0.267604  |
| C | 3.073831  | -3.344297 | -1.958678 |
| H | 3.135742  | -2.796904 | -2.905951 |
| H | 2.520115  | -4.273144 | -2.137110 |
| H | 4.093526  | -3.619289 | -1.665275 |
| C | 2.388764  | 2.605915  | -0.702638 |
| H | 1.371305  | 2.417690  | -1.062620 |
| C | 3.081190  | 3.504412  | -1.731511 |
| H | 3.140994  | 3.020032  | -2.712617 |
| H | 4.101812  | 3.757442  | -1.422122 |
| H | 2.529059  | 4.443942  | -1.848050 |
| C | 2.266813  | 3.303714  | 0.655813  |
| H | 1.738433  | 2.669601  | 1.375737  |
| H | 1.711996  | 4.243663  | 0.552080  |
| H | 3.253401  | 3.541829  | 1.070915  |

71

[Au(IPr)CO<sub>3</sub>H]

|    |           |           |           |
|----|-----------|-----------|-----------|
| Au | 0.000170  | -0.624266 | -1.091128 |
| O  | 0.000745  | -1.726189 | -2.805798 |
| C  | -0.000254 | 0.503472  | 0.525872  |
| N  | 1.073171  | 0.960937  | 1.216991  |
| C  | 0.676902  | 1.691208  | 2.321137  |
| H  | 1.391438  | 2.137321  | 2.994292  |
| C  | -0.678090 | 1.690990  | 2.321025  |
| H  | -1.392895 | 2.136867  | 2.994051  |
| N  | -1.073941 | 0.960619  | 1.216789  |
| C  | 0.001601  | -3.017849 | -2.787638 |
| O  | 0.002452  | -3.765974 | -3.745046 |
| O  | 0.001442  | -3.543976 | -1.509652 |

|   |           |           |           |
|---|-----------|-----------|-----------|
| H | 0.002116  | -4.499019 | -1.650246 |
| C | -2.442196 | 0.717038  | 0.852779  |
| C | -3.071467 | -0.436611 | 1.345853  |
| C | -3.088626 | 1.647511  | 0.024220  |
| C | -4.404372 | -0.641213 | 0.983434  |
| C | -4.420604 | 1.392302  | -0.306905 |
| C | -5.073220 | 0.261524  | 0.167066  |
| H | -4.922772 | -1.526239 | 1.342303  |
| H | -4.950624 | 2.086747  | -0.953087 |
| H | -6.109175 | 0.079923  | -0.106069 |
| C | 2.441563  | 0.717787  | 0.853215  |
| C | 3.087872  | 1.648480  | 0.024804  |
| C | 3.071092  | -0.435689 | 1.346363  |
| C | 4.419977  | 1.393663  | -0.306106 |
| C | 4.404123  | -0.639889 | 0.984179  |
| C | 5.072843  | 0.263063  | 0.167945  |
| H | 4.949918  | 2.088295  | -0.952153 |
| H | 4.922710  | -1.524781 | 1.343105  |
| H | 6.108906  | 0.081788  | -0.105001 |
| C | -2.364223 | -1.445150 | 2.231132  |
| H | -1.338210 | -1.096753 | 2.394726  |
| C | -2.274836 | -2.815639 | 1.552002  |
| H | -3.271360 | -3.233245 | 1.365876  |
| H | -1.746012 | -2.757033 | 0.594841  |
| H | -1.735542 | -3.519388 | 2.197158  |
| C | -3.038938 | -1.547511 | 3.602560  |
| H | -4.065085 | -1.923075 | 3.515801  |
| H | -2.486494 | -2.240473 | 4.247313  |
| H | -3.081608 | -0.574423 | 4.104749  |
| C | -2.390333 | 2.873920  | -0.532378 |
| H | -1.384616 | 2.921566  | -0.099547 |
| C | -3.116172 | 4.165071  | -0.143383 |
| H | -2.562928 | 5.036398  | -0.511744 |
| H | -4.122169 | 4.207239  | -0.576165 |
| H | -3.216392 | 4.258921  | 0.943706  |
| C | -2.228417 | 2.763166  | -2.051983 |
| H | -1.678812 | 1.856158  | -2.325328 |
| H | -3.202998 | 2.730487  | -2.553036 |
| H | -1.680577 | 3.629491  | -2.440969 |
| C | 2.364021  | -1.444427 | 2.231547  |
| H | 1.337842  | -1.096402 | 2.394886  |
| C | 3.038490  | -1.546422 | 3.603124  |
| H | 2.486227  | -2.239609 | 4.247792  |
| H | 4.064826  | -1.921523 | 3.516585  |
| H | 3.080616  | -0.573294 | 4.105282  |
| C | 2.275285  | -2.814999 | 1.552520  |
| H | 1.746719  | -2.756663 | 0.595201  |
| H | 3.271990  | -3.232330 | 1.366759  |
| H | 1.736012  | -3.518850 | 2.197589  |
| C | 2.389346  | 2.874726  | -0.531864 |
| H | 1.383566  | 2.922144  | -0.099156 |
| C | 2.227622  | 2.763923  | -2.051479 |
| H | 3.202255  | 2.731533  | -2.552454 |
| H | 1.678277  | 1.856777  | -2.324879 |
| H | 1.679573  | 3.630101  | -2.440504 |
| C | 3.114835  | 4.166046  | -0.142808 |
| H | 4.120881  | 4.208443  | -0.575458 |
| H | 2.561439  | 5.037243  | -0.511251 |
| H | 3.214897  | 4.259941  | 0.944291  |

Optimization of  $[(\text{IPrAu})_3\text{CO}_3]^+$  (**3**) at the PBE0/ECP1 level afforded a minimum with essentially planar  $\text{CO}_3$  moiety (sum of the OCO bond angles  $360.0^\circ$ ) and the three Au atoms and the C atoms from the NHCs bonded to them all within  $\pm 0.06 \text{ \AA}$  of this plane. Two of the NHCs are essentially perpendicular to this plane (with  $C_{\text{central}}$ -

O<sup>⋯</sup>C<sub>NHC</sub>-N dihedral angles of ca. 87° and one is slightly twisted (dihedral angle ca. 58°). Gold atoms show the expected linear coordination (C-Au-O angles ca. 177° - 179°) and a κ<sup>1</sup>, "side-on" coordination mode to the carbonate O atoms (C-O-Au angles ca. 119° - 120°).

**Figure S1 Electrostatic Potential of 3**

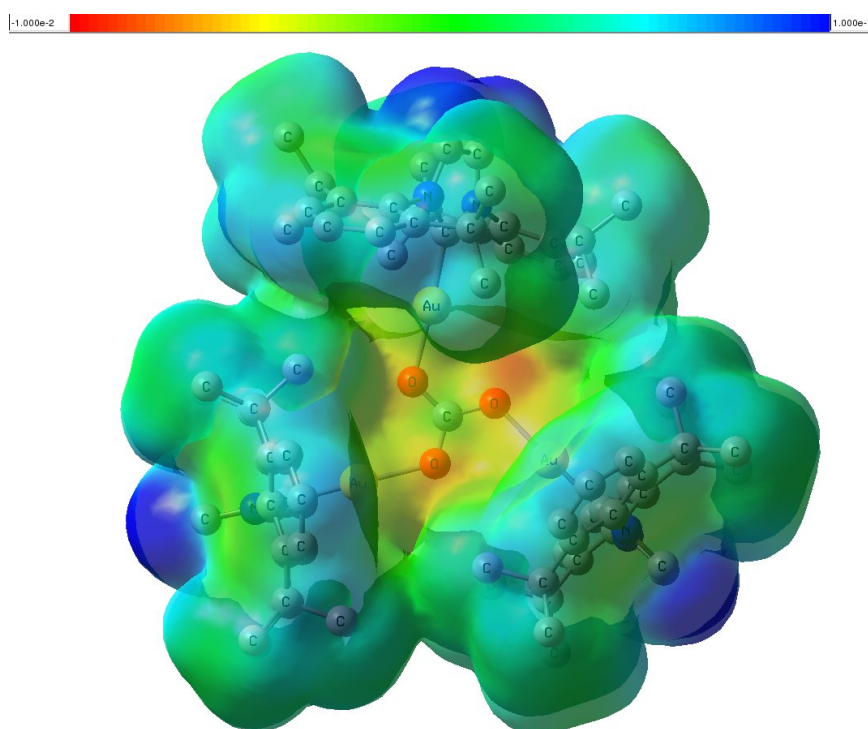

The central carbon atom of the CO<sub>3</sub> moiety has the highest positive charge of any atom (+1.0e from natural population analysis at the PBE0/ECP2/PCM level). As apparent from the electrostatic potential plotted in **Figure S1**, the charge on this atom is rather offset by the negative charges on the O atoms around it (-0.8e), and the most positive areas are at the CH=CH bridges of the NHCs. Because the CO<sub>3</sub> moiety is sterically shielded by the bulky IPr groups it is rather difficult to predict its reactivity, e.g. with nucleophiles, on these grounds.



- **Kinetic Experiments**

A purpose-built, high-pressure, continuously stirred tank reactor (CSTR), fitted with spectroscopic windows (CaF<sub>2</sub>), was purged with N<sub>2</sub> and charged with a solution of **1** (150 mg, 0.25 mmol) and **2** (317 mg, 0.25 mmol) in dry, degassed dichloromethane (40 mL) under a continuous stream of N<sub>2</sub>. After cooling to the desired reaction temperature, CO<sub>2</sub> (BOC, CO<sub>2</sub> vapour withdrawal cylinder) was added to the CSTR via a needle valve to a total reactor pressure of 1.2 bar. During the gas addition, single beam infrared spectra were recorded continuously using a Nicolet Nexus spectrometer (4 cm<sup>-1</sup> resolution, 8 - 64 scans depending on reaction temperature). Single beam spectra were ratioed against backgrounds of dichloromethane under identical gas compositions. Kinetic information was then calculated from the integrated absorbance of the Au-OH stretching region as a function of time. The limits of integration were taken as 3626 – 3482 cm<sup>-1</sup> with a linear baseline defined by the same limits. Kinetic traces were fitted to single exponentials of the general form  $\text{Area} = A + B \exp(-k_{\text{obs}}t)$  and the activation parameters were derived from the corresponding Eyring-Polanyi plot.

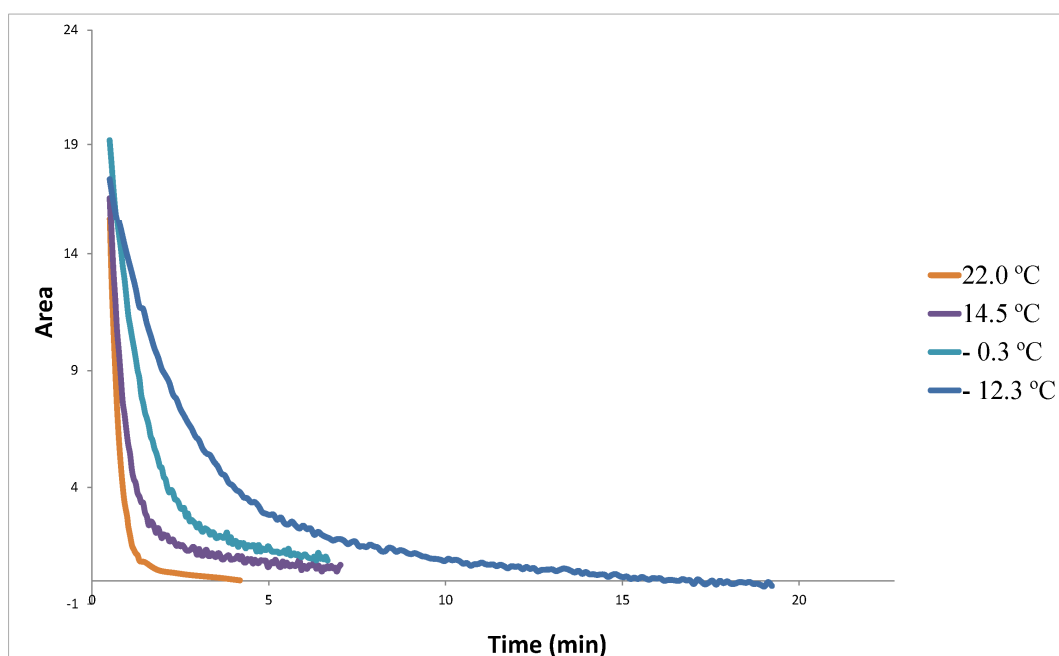

**Fig S2.** Integrated absorbance of the Au-OH stretching vs time (min)

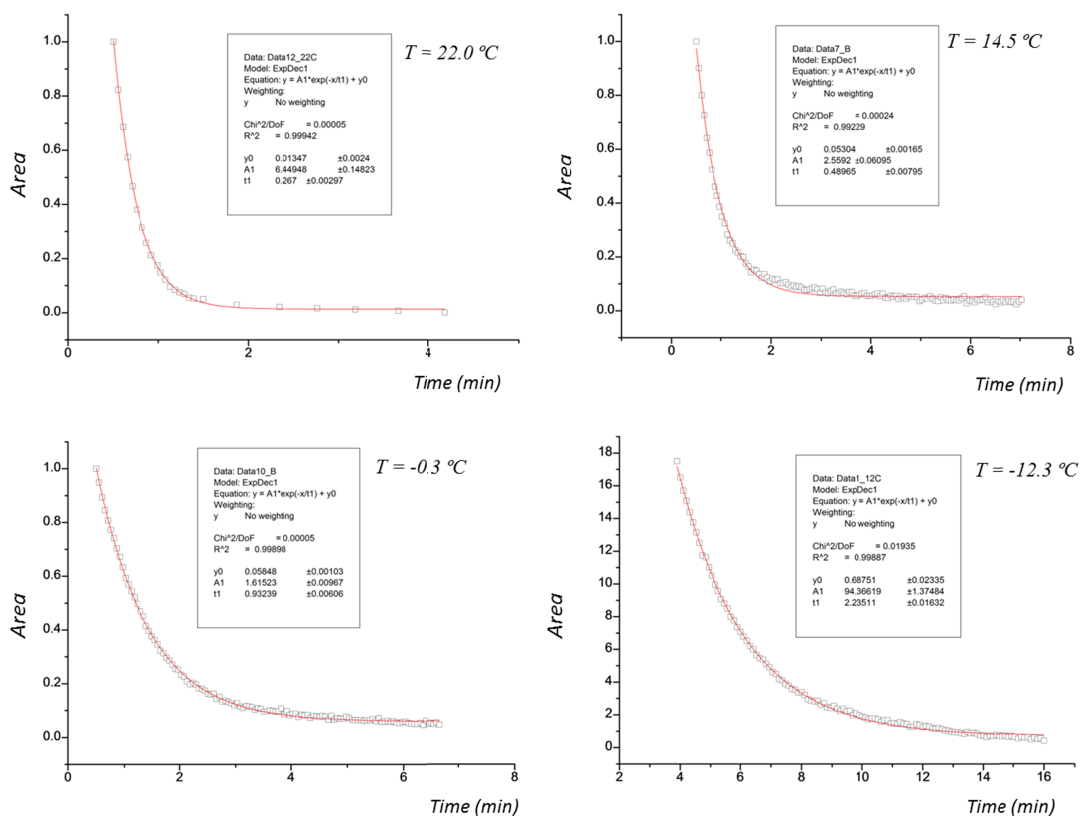

**Fig S3.** Plot of [1+2] vs time at four different temperatures. Data fitted to single exponentials.

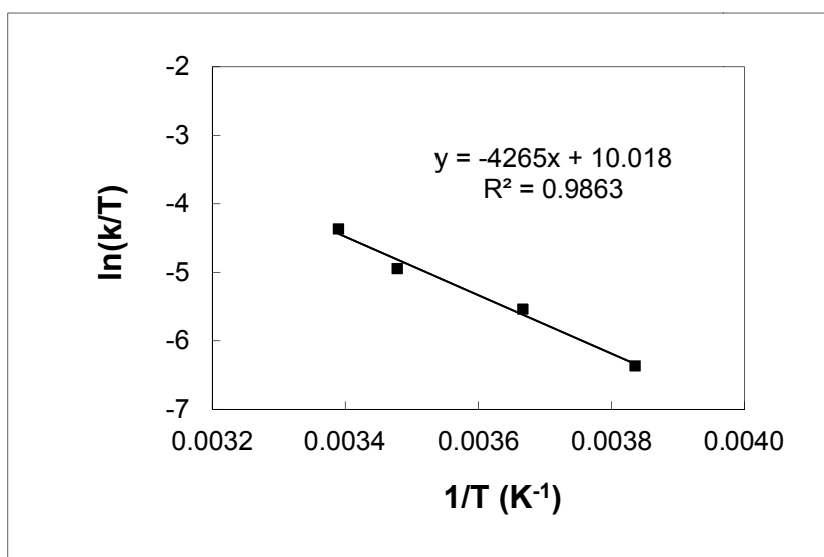

**Fig. S4** Eyring-Polanyi plot for the obtained kinetic data

- **Crystallographic information of complex 3**

### *EXPERIMENTAL DETAILS*

#### Data Collection

A colorless prism crystal of  $C_{164.5}H_{217}Au_6B_2ClF_8N_{12}O_6$  having approximate dimensions of 0.240 x 0.090 x 0.090 mm was mounted in a loop. All measurements were made on a Rigaku XtaLAB P200 diffractometer using multi-layer mirror monochromated Mo-K $\alpha$  radiation.

The crystal-to-detector distance was 45.01 mm.

Cell constants and an orientation matrix for data collection corresponded to a primitive triclinic cell with dimensions:

$$\begin{aligned} a &= 18.436(2) \text{ \AA} & \alpha &= 99.0625(14)^\circ \\ b &= 18.589(2) \text{ \AA} & \beta &= 91.888(2)^\circ \\ c &= 30.244(3) \text{ \AA} & \gamma &= 117.078(3)^\circ \\ V &= 9048.7(17) \text{ \AA}^3 \end{aligned}$$

For  $Z = 2$  and F.W. = 3849.46, the calculated density is 1.413 g/cm<sup>3</sup>. Based on a statistical analysis of intensity distribution, and the successful solution and refinement of the structure, the space group was determined to be:

P-1 (#2)

The data were collected at a temperature of  $-100 \pm 1^\circ\text{C}$  to a maximum  $2\theta$  value of  $51.2^\circ$ . A total of 1440 oscillation images were collected. A sweep of data was done using  $\omega$  scans from  $-100.0$  to  $80.0^\circ$  in  $0.50^\circ$  step, at  $\chi=45.0^\circ$  and  $\phi = 0.0^\circ$ . The exposure rate was 40.0 [sec./ $^\circ$ ]. The detector swing angle was  $-10.41^\circ$ . A second sweep was performed using  $\omega$  scans from  $-100.0$  to  $80.0^\circ$  in  $0.50^\circ$  step, at  $\chi=45.0^\circ$  and  $\phi = 90.0^\circ$ . The exposure rate was 40.0 [sec./ $^\circ$ ]. The detector swing angle was  $-10.41^\circ$ . Another sweep was performed using  $\omega$  scans from  $-100.0$  to  $80.0^\circ$  in  $0.50^\circ$  step, at  $\chi=45.0^\circ$  and  $\phi = 180.0^\circ$ . The exposure rate was 40.0 [sec./ $^\circ$ ]. The detector swing angle was  $-10.41^\circ$ . Another sweep was performed using  $\omega$  scans from  $-100.0$  to  $80.0^\circ$  in  $0.50^\circ$  step, at  $\chi=45.0^\circ$  and  $\phi = 120.0^\circ$ . The exposure rate was 40.0 [sec./ $^\circ$ ]. The detector swing angle was  $-10.41^\circ$ . The crystal-to-detector distance was 45.01 mm. Readout was performed in the 0.086 mm pixel mode.

#### Data Reduction

Of the 144400 reflections were collected, where 33347 were unique ( $R_{int} = 0.1068$ ); equivalent reflections were merged. Data were collected and processed using CrystalClear (Rigaku).<sup>12</sup>

The linear absorption coefficient,  $\mu$ , for Mo-K $\alpha$  radiation is 49.362 cm<sup>-1</sup>. An empirical absorption correction was applied which resulted in transmission factors ranging from 0.469 to 0.641. The data were corrected for Lorentz and polarization effects.

### Structure Solution and Refinement

The structure was solved by direct methods<sup>13</sup> and expanded using Fourier techniques. The non-hydrogen atoms were refined anisotropically. Hydrogen atoms were refined using the riding model. The final cycle of full-matrix least-squares refinement<sup>14</sup> on  $F^2$  was based on 33347 observed reflections and 1854 variable parameters and converged (largest parameter shift was 0.00 times its esd) with unweighted and weighted agreement factors of:

$$R1 = \Sigma ||F_o| - |F_c|| / \Sigma |F_o| = 0.1043$$

$$wR2 = [ \Sigma ( w (F_o^2 - F_c^2)^2 ) / \Sigma w(F_o^2)^2 ]^{1/2} = 0.3191$$

The goodness of fit<sup>15</sup> was 1.05. Unit weights were used. Plots of  $\Sigma w (|F_o| - |F_c|)^2$  versus  $|F_o|$ , reflection order in data collection,  $\sin \theta/\lambda$  and various classes of indices showed no unusual trends. The maximum and minimum peaks on the final difference Fourier map corresponded to 6.25 and -2.43 e<sup>-</sup>/Å<sup>3</sup>, respectively.

Neutral atom scattering factors were taken from International Tables for Crystallography (IT), Vol. C, Table 6.1.1.4<sup>16</sup>. Anomalous dispersion effects were

<sup>12</sup> CrystalClear: Data Collection and Processing Software, Rigaku Corporation (1998-2014). Tokyo 196-8666, Japan.

<sup>13</sup> SIR2004: Burla, M. C., Caliendo, R., Camalli, M., Carrozzini, B., Cascarano, G. L., De Caro, L., Giacovazzo, C., Polidori, G. and Spagna R. (2005). J. Appl. Cryst. 38, 381-388.

<sup>14</sup> Least Squares function minimized: (SHELXL2013)

$$\Sigma w(F_o^2 - F_c^2)^2 \quad \text{where } w = \text{Least Squares weights.}$$

<sup>15</sup> Goodness of fit is defined as:

$$[\Sigma w(F_o^2 - F_c^2)^2 / (N_o - N_v)]^{1/2}$$

where:  $N_o$  = number of observations

$N_v$  = number of variables

<sup>16</sup> International Tables for Crystallography, Vol.C (1992). Ed. A.J.C. Wilson, Kluwer Academic Publishers, Dordrecht, Netherlands, Table 6.1.1.4, pp. 572.

included in  $F_{\text{calc}}$ ;<sup>17</sup> the values for  $\Delta f'$  and  $\Delta f''$  were those of Creagh and McAuley.<sup>18</sup> The values for the mass attenuation coefficients are those of Creagh and Hubbell.<sup>19</sup> All calculations were performed using the CrystalStructure<sup>20</sup> crystallographic software package except for refinement, which was performed using SHELXL-2013.<sup>21</sup>

#### A. Crystal Data

|                      |                                                                                                                                                                                                                         |
|----------------------|-------------------------------------------------------------------------------------------------------------------------------------------------------------------------------------------------------------------------|
| Empirical Formula    | $\text{C}_{164.5}\text{H}_{217}\text{Au}_6\text{B}_2\text{ClF}_8\text{N}_{12}\text{O}_6$                                                                                                                                |
| Formula Weight       | 3849.46                                                                                                                                                                                                                 |
| Crystal Color, Habit | colorless, prism                                                                                                                                                                                                        |
| Crystal Dimensions   | 0.240 X 0.090 X 0.090 mm                                                                                                                                                                                                |
| Crystal System       | triclinic                                                                                                                                                                                                               |
| Lattice Type         | Primitive                                                                                                                                                                                                               |
| Lattice Parameters   | $a = 18.436(2) \text{ \AA}$<br>$b = 18.589(2) \text{ \AA}$<br>$c = 30.244(3) \text{ \AA}$<br>$\alpha = 99.0625(14)^\circ$<br>$\beta = 91.888(2)^\circ$<br>$\gamma = 117.078(3)^\circ$<br>$V = 9048.7(17) \text{ \AA}^3$ |
| Space Group          | P-1 (#2)                                                                                                                                                                                                                |
| Z value              | 2                                                                                                                                                                                                                       |
| $D_{\text{calc}}$    | 1.413 g/cm <sup>3</sup>                                                                                                                                                                                                 |
| $F_{000}$            | 3818.00                                                                                                                                                                                                                 |

<sup>17</sup> Ibers, J. A. & Hamilton, W. C.; Acta Crystallogr., 17, 781 (1964).

<sup>18</sup> Creagh, D. C. & McAuley, W.J. ; "International Tables for Crystallography", Vol C, (A.J.C. Wilson, ed.), Kluwer Academic Publishers, Boston, Table 4.2.6.8, pages 219-222 (1992).

<sup>19</sup> Creagh, D. C. & Hubbell, J.H.; "International Tables for Crystallography", Vol C, (A.J.C. Wilson, ed.), Kluwer Academic Publishers, Boston, Table 4.2.4.3, pages 200-206 (1992).

<sup>20</sup> CrystalStructure 4.1: Crystal Structure Analysis Package, Rigaku Corporation (2000-2014). Tokyo 196-8666, Japan.

<sup>21</sup> SHELXL2013: Sheldrick, G. M. (2008). Acta Cryst. A64, 112-122.

$\mu(\text{MoK}\alpha)$  49.362  $\text{cm}^{-1}$

## B. Intensity Measurements

|                                                        |                                                  |
|--------------------------------------------------------|--------------------------------------------------|
| Diffractometer                                         | XtaLAB P200                                      |
| Radiation                                              | MoK $\alpha$ ( $\lambda = 0.71075 \text{ \AA}$ ) |
| monochromated                                          | multi-layer mirror                               |
| Voltage, Current                                       | 45kV, 66mA                                       |
| Temperature                                            | -100.0°C                                         |
| Detector Aperture                                      | 83.8 x 70.0 mm                                   |
| Data Images                                            | 1440 exposures                                   |
| $\omega$ oscillation Range ( $\chi=45.0, \phi=0.0$ )   | -100.0 - 80.0°                                   |
| Exposure Rate                                          | 40.0 sec./°                                      |
| Detector Swing Angle                                   | -10.41°                                          |
| $\omega$ oscillation Range ( $\chi=45.0, \phi=90.0$ )  | -100.0 - 80.0°                                   |
| Exposure Rate                                          | 40.0 sec./°                                      |
| Detector Swing Angle                                   | -10.41°                                          |
| $\omega$ oscillation Range ( $\chi=45.0, \phi=180.0$ ) | -100.0 - 80.0°                                   |
| Exposure Rate                                          | 40.0 sec./°                                      |
| Detector Swing Angle                                   | -10.41°                                          |
| $\omega$ oscillation Range ( $\chi=45.0, \phi=120.0$ ) | -100.0 - 80.0°                                   |
| Exposure Rate                                          | 40.0 sec./°                                      |
| Detector Swing Angle                                   | -10.41°                                          |
| Detector Position                                      | 45.01 mm                                         |

|                             |                                                                       |
|-----------------------------|-----------------------------------------------------------------------|
| Pixel Size                  | 0.086 mm                                                              |
| $2\theta_{\max}$            | 51.2°                                                                 |
| No. of Reflections Measured | Total: 144400<br>Unique: 33347 ( $R_{\text{int}} = 0.1068$ )          |
| Corrections                 | Lorentz-polarization<br>Absorption<br>(trans. factors: 0.469 - 0.641) |

### C. Structure Solution and Refinement

|                                      |                                                                                                                       |
|--------------------------------------|-----------------------------------------------------------------------------------------------------------------------|
| Structure Solution                   | Direct Methods (SIR2004)                                                                                              |
| Refinement                           | Full-matrix least-squares on $F^2$                                                                                    |
| Function Minimized                   | $\sum w (F_o^2 - F_c^2)^2$                                                                                            |
| Least Squares Weights                | $w = 1 / [ \sigma^2(F_o^2) + (0.1678 \cdot P)^2 + 85.7639 \cdot P ]$<br>where $P = (\text{Max}(F_o^2, 0) + 2F_c^2)/3$ |
| $2\theta_{\max}$ cutoff              | 51.2°                                                                                                                 |
| Anomalous Dispersion                 | All non-hydrogen atoms                                                                                                |
| No. Observations (All reflections)   | 33347                                                                                                                 |
| No. Variables                        | 1854                                                                                                                  |
| Reflection/Parameter Ratio           | 17.99                                                                                                                 |
| Residuals: $R_1 (I > 2.00\sigma(I))$ | 0.1043                                                                                                                |
| Residuals: $R$ (All reflections)     | 0.1382                                                                                                                |
| Residuals: $wR_2$ (All reflections)  | 0.3191                                                                                                                |
| Goodness of Fit Indicator            | 1.046                                                                                                                 |
| Max Shift/Error in Final Cycle       | 0.001                                                                                                                 |
| Maximum peak in Final Diff. Map      | 6.25 e <sup>-</sup> /Å <sup>3</sup>                                                                                   |

Minimum peak in Final Diff. Map -2.43 e-/Å<sup>3</sup>

## B. Intensity Measurements

|                                                        |                                       |
|--------------------------------------------------------|---------------------------------------|
| Diffractometer                                         | XtaLAB P200                           |
| Radiation                                              | MoK $\alpha$ ( $\lambda = 0.71075$ Å) |
| monochromated                                          | multi-layer mirror                    |
| Voltage, Current                                       | 45kV, 66mA                            |
| Temperature                                            | -100.0°C                              |
| Detector Aperture                                      | 83.8 x 70.0 mm                        |
| Data Images                                            | 1440 exposures                        |
| $\omega$ oscillation Range ( $\chi=45.0, \phi=0.0$ )   | -100.0 - 80.0°                        |
| Exposure Rate                                          | 40.0 sec./°                           |
| Detector Swing Angle                                   | -10.41°                               |
| $\omega$ oscillation Range ( $\chi=45.0, \phi=90.0$ )  | -100.0 - 80.0°                        |
| Exposure Rate                                          | 40.0 sec./°                           |
| Detector Swing Angle                                   | -10.41°                               |
| $\omega$ oscillation Range ( $\chi=45.0, \phi=180.0$ ) | -100.0 - 80.0°                        |
| Exposure Rate                                          | 40.0 sec./°                           |
| Detector Swing Angle                                   | -10.41°                               |
| $\omega$ oscillation Range ( $\chi=45.0, \phi=120.0$ ) | -100.0 - 80.0°                        |
| Exposure Rate                                          | 40.0 sec./°                           |
| Detector Swing Angle                                   | -10.41°                               |
| Detector Position                                      | 45.01 mm                              |
| Pixel Size                                             | 0.086 mm                              |



$2\theta_{\max}$

51.2°

No. of Reflections Measured

Total: 144400

Unique: 33347 ( $R_{\text{int}} = 0.1068$ )

Corrections

Lorentz-polarization

Absorption

(trans. factors: 0.469 - 0.641)
